# Supplementary material for: Reducing complexity and unidentifiability when modelling human atrial cells
Source: PubMed Central journal article supplement (PMC7287336; doi:10.1098/rsta.2019.0339), 2020-05-25
Supplement: rsta20190339supp1.pdf [file rsta20190339supp1.pdf]

## Contents

|                                                                                   |           |
|-----------------------------------------------------------------------------------|-----------|
| <b>S1 Datasets and simulations</b>                                                | <b>2</b>  |
| S1.1 Data sources . . . . .                                                       | 2         |
| S1.2 Temperature adjustment . . . . .                                             | 3         |
| S1.3 Voltage-clamp protocols and summary statistic functions . . . . .            | 5         |
| S1.3.1 $I_{Na}$ . . . . .                                                         | 5         |
| S1.3.2 $I_{CaL}$ . . . . .                                                        | 6         |
| S1.3.3 $I_{to}$ . . . . .                                                         | 8         |
| S1.3.4 $I_{Kur}$ . . . . .                                                        | 10        |
| <b>S2 Approximate Bayesian computation</b>                                        | <b>12</b> |
| <b>S3 Additional results</b>                                                      | <b>13</b> |
| S3.1 Gating functions for calibrations to original and unified datasets . . . . . | 13        |
| S3.2 $I_{CaL}$ . . . . .                                                          | 15        |
| S3.3 $I_{to}$ . . . . .                                                           | 15        |
| S3.4 $I_{Kur}$ . . . . .                                                          | 16        |
| S3.5 Goodness-of-fit residuals . . . . .                                          | 17        |
| S3.6 Action potential response . . . . .                                          | 18        |
| <b>S4 Model equations and numerical results</b>                                   | <b>25</b> |
| S4.1 $I_{Na}$ . . . . .                                                           | 25        |
| S4.2 $I_{CaL}$ . . . . .                                                          | 29        |
| S4.3 $I_{to}$ . . . . .                                                           | 34        |
| S4.4 $I_{Kur}$ . . . . .                                                          | 38        |

# S1 Datasets and simulations

## S1.1 Data sources

Table 1 contains a complete list of all experimental data sources for both original and unified datasets.

| Channel            | Gate                            |                            | Data                                                      | N [1]          | C [2]          | Unified        |
|--------------------|---------------------------------|----------------------------|-----------------------------------------------------------|----------------|----------------|----------------|
| $I_{\text{Na}}$    | activation, $m$                 | $m_{\infty}$               | Fig. 2 [3]                                                | ✓              | ✓              | ✓              |
|                    |                                 | $\tau_m$                   | Fig. 3C [4]                                               | ✗              | ✓              | ✓              |
|                    | inactivation*, $\{h, j\}$       | $\{h, j\}_{\infty}$        | Fig. 7 [3]                                                | ✓              | ✓              | ✓              |
|                    |                                 | $\tau_{\{h, j\}}$ (inact.) | Fig. 5B [3]                                               | ✗              | ✓              | ✓              |
|                    |                                 | $\tau_{\{h, j\}}$ (recov.) | Fig. 9 [3]                                                | ✗              | ✓              | ✓              |
| $I_{\text{CaL}}$   | activation, $d$                 | $d_{\infty}$               | Fig. 5C [5] <sup>a</sup><br>Fig. 2B [6] <sup>b</sup>      | ✓ <sup>a</sup> | ✓ <sup>b</sup> | ✓ <sup>b</sup> |
|                    |                                 | $\tau_d$                   | Pg. H233 [6]                                              | ✗              | ✗              | ✓              |
|                    | inactivation <sup>†</sup> , $f$ | $f_{\infty}$               | Fig. 2B [6]                                               | ✓              | ✓              | ✓              |
|                    |                                 | $\tau_f$ (inact.)          | Fig. 3B [6] <sup>a</sup><br>Fig. 4B [7] <sup>b</sup>      | ✓ <sup>a</sup> | ✓ <sup>b</sup> | ✓ <sup>a</sup> |
|                    |                                 | $\tau_f$ (recov.)          | Pg. H230 [6]                                              | ✓              | ✗              | ✓              |
| $I_{\text{to}}$    | activation, $r$                 | $r_{\infty}$               | Fig. 3A [8] <sup>a</sup><br>Fig. 2A [9] <sup>b</sup>      | ✓ <sup>a</sup> | ✓ <sup>b</sup> | ✓ <sup>b</sup> |
|                    |                                 | $\tau_r$ (act.)            | Fig. 5D [2] <sup>‡</sup>                                  | ✗              | ✓              | ✓              |
|                    |                                 | $\tau_r$ (deact.)          | Fig. 5D [2] <sup>‡</sup>                                  | ✗              | ✓              | ✓              |
|                    | inactivation, $s$               | $s_{\infty}$               | Fig. 3C [10] <sup>a</sup><br>Fig. 2C [9] <sup>b</sup>     | ✓ <sup>a</sup> | ✓ <sup>b</sup> | ✓ <sup>b</sup> |
|                    |                                 | $\tau_s$ (inact.)          | Fig. 4C [1] <sup>a,‡</sup><br>Fig. 5D [2] <sup>b,‡</sup>  | ✓ <sup>a</sup> | ✓ <sup>b</sup> | ✓ <sup>b</sup> |
|                    |                                 | $\tau_s$ (recov.)          | Fig. 4C [1] <sup>a,‡</sup><br>Fig. 5D [2] <sup>b,‡</sup>  | ✓ <sup>a</sup> | ✓ <sup>b</sup> | ✓ <sup>b</sup> |
|                    |                                 |                            |                                                           |                |                |                |
| $I_{\text{Kur}}^*$ | activation, $a$                 | $a_{\infty}$               | Fig. 8E [9]                                               | ✓              | ✓              | ✓              |
|                    |                                 | $\tau_a$ (act.)            | Fig. 8F [9]                                               | ✓              | ✓              | ✓              |
|                    |                                 | $\tau_a$ (deact.)          | Fig. 5B [2] <sup>‡</sup>                                  | ✗              | ✓              | ✓              |
|                    | inactivation, $i$               | $i_{\infty}$               | Fig. 3C [10] <sup>a,§</sup><br>Fig. 7A [9] <sup>b,§</sup> | ✓ <sup>a</sup> | ✓ <sup>b</sup> | ✓ <sup>a</sup> |
|                    |                                 | $\tau_i$ (inact.)          | Fig. 4D [1] <sup>a,‡</sup><br>Fig. 5B [2] <sup>b,‡</sup>  | ✓ <sup>a</sup> | ✓ <sup>b</sup> | ✓ <sup>a</sup> |
|                    |                                 | $\tau_i$ (recov.)          | Fig. 4D [1] <sup>‡</sup>                                  | ✓              | ✗              | ✓              |

**Supplementary Table 1:** Summary of patch clamp experimental datasets used in modelling papers in human atrial myocytes for each channel studied. Ticks and crosses are used to indicate which datasets are included in the original model calibration and which compose the unified dataset. \*There are some differences in the terminology used in each model. The N model refers to the inactivation gates of  $I_{\text{Na}}$  as  $h_1$  and  $h_2$ , and the  $I_{\text{Kur}}$  channel as  $I_{\text{sus}}$ . <sup>†</sup>The L-type calcium current has a calcium-dependent inactivation process which is not calibrated in this experiment (discussed further in results). <sup>‡</sup>In some cases it was not clear from the modelling paper where the comparison data plotted were obtained from. In these cases, the data points from the modelling paper itself are used and a protocol assumed based on the experimental paper cited. <sup>§</sup>In some cases it was not explicit which figure among a number of possibilities within a cited data source was used; the choice was inferred from the modelling paper.

## S1.2 Temperature adjustment

The N model was created to simulate a human atrial action potential at 306.15K ( $33^{\circ}\text{C}$ ), whereas the C model was created to simulate at 310K ( $\sim 37^{\circ}\text{C}$ ). Time constant measurements of rise and decay rates are temperature-dependent, and thus it was important to account for this during the calibration. During ABC, time constant measurements from the experimental sources were adjusted to the temperature of the model being calibrated using a Q10 factor from an experimental source. The Q10 factors used are:  $I_{\text{Na}}$ : 2.79 [11];  $I_{\text{CaL}}$ : 1.7 (activation), 1.3 (inactivation), both calculated from values in [6];  $I_{\{\text{to}, \text{Kur}\}}$ : 2.2 [9]. In the original publication for the C model,  $I_{\text{to}}$  and  $I_{\text{Kur}}$  were fitted at room temperature (295.15K) and then adjusted by the authors to the model temperature (310K) by dividing time constants by a factor of 3 [2]. To maintain consistency, we also calibrate the C model at room temperature rather than make any adjustment to the experimental data. The time constants for this channel are adjusted before being used to simulate a full action potential. The S model was always calibrated by adjusting experimental data to 310K. Figure 1 shows the temperature-adjusted datasets for all experiments across channel models.

When comparing channel models on the same figure throughout this work, their time constants are adjusted for the same temperature of 310K. For full action potential simulations, the N and C model time constants are kept at their model temperature, and only the S model time constant adjusted from 310K to 306.15K when it is added to the N model.

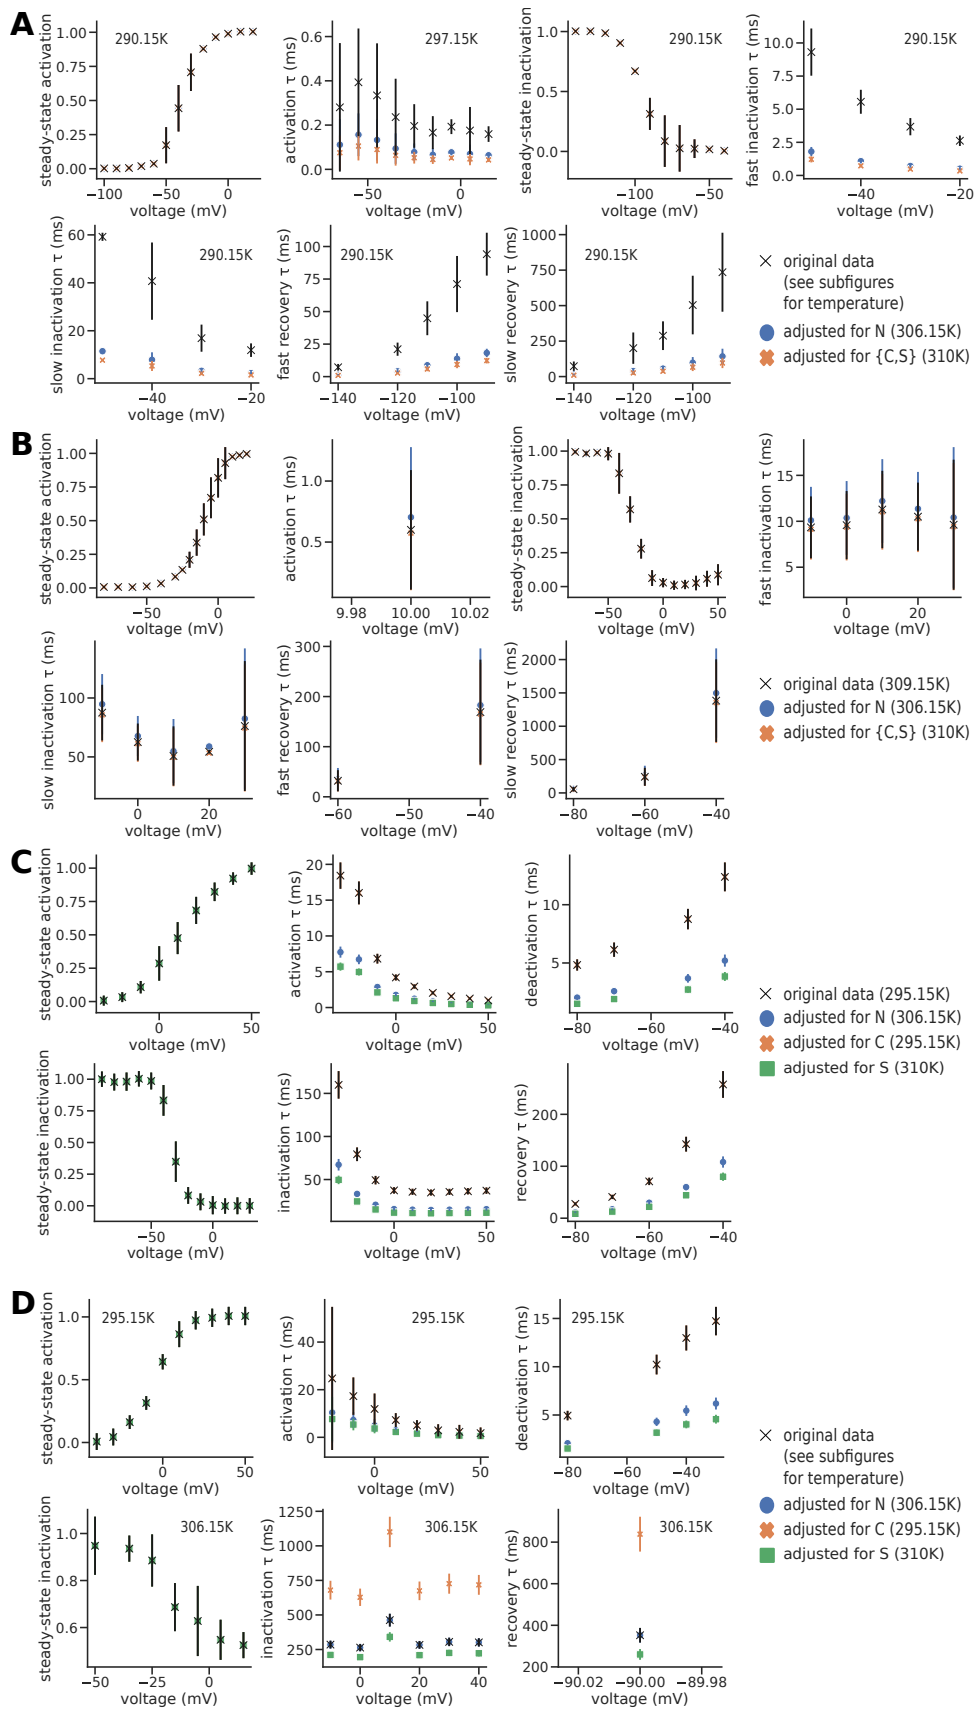

**Supplementary Figure 1:** Unified datasets for each channel model showing adjustments to experimental calibrating data at each model temperature. The adjustment is made using a Q10 factor as indicated in the text. **A**  $I_{Na}$ . **B**  $I_{CaL}$ . **C**  $I_{to}$ . **D**  $I_{Kur}$ .

### S1.3 Voltage-clamp protocols and summary statistic functions

Throughout this section, the lettering in the headers refers to the figure describing voltage protocols for the channel. All curve fitting for finding time constants was carried out using the *scipy.optimize* Python library.

#### S1.3.1 $I_{Na}$

All experiments by Sakakibara et al. [3] used equal extracellular and pipette solution sodium concentration of 5mM at a temperature of 290K (17°C). The time constant of activation experiment from Schneider et al. [4] used sodium concentration of 120mM in the extracellular solution and 70mM in the pipette solution, and the experiment was conducted at 297K (24°C).

**A: Steady-state activation** (p.538 [3]). The standard protocol to measure steady-state activation of the channel holds the membrane at a sub-threshold potential of  $-140\text{mV}$  and then steps the channel to a series of voltage steps between  $-100\text{mV}$  and  $20\text{mV}$ , with intervals of  $10\text{mV}$ . The steps last for 1s and there are 10s between each step.

The degree of steady-state activation is measured by recording the peak current during the voltage step (normalised to cell capacitance). The conductance is calculated by dividing the peak current by the forcing term, usually assumed to be the potential difference to the Nernst potential of the primary ion carrier,  $g = \frac{I}{V - E_x}$ . In the computational protocols, we directly measure the conductance of the channel to bypass this calculation. To plot the activation curve, the conductance is plotted against the voltage step normalised to its maximum value in any voltage step.

**B: Time constant of activation** (p.85 [4]). The time constant constant of inactivation is measured by fitting an equation to the current trace from a standard steady-state activation protocol as described in the previous protocol. In this case, the holding potential is  $-135\text{mV}$  and the steps are from  $-65\text{mV}$  and  $15\text{mV}$  in steps of  $10\text{mV}$ . The time at holding potential between each step was not given and so assumed to be 10s (more than enough for the  $I_{Na}$  channel to return to steady-state) and each test pulse lasted for 12ms.

The activation time constant was measured by fitting the entire current trace at a pulse to the equation  $I_{Na} = I_{Na,\max} [1 - e^{-t/\tau_m}]^3 e^{-t/\tau_h} + \text{constant}$  (p.87 [4]). In this equation,  $t$  is the time in ms,  $I_{Na,\max}$  is the peak of the current trace,  $\tau_m$  is the activation time constant and  $\tau_h$  is the inactivation time constant.

**C: Steady-state inactivation** (p.541 [3]). The protocol used to measure steady-state inactivation is often also referred to as an availability protocol. The membrane is held at a holding potential of  $-140\text{mV}$  for 10s, then stepped to a conditioning potential for 1s to activate and inactivate the channel. The membrane potential is returned to the holding potential for 2ms before stepping to a test pulse at  $-20\text{mV}$  for 30ms. A series of different conditioning pulses between  $-140\text{mV}$  and  $-40\text{mV}$  in steps of  $10\text{mV}$  is used to test the amount of inactivation of the channel at different voltages.

The steady-state inactivation is measured by recording the peak current during the test pulse, normalised to the current in a test pulse when no conditioning step is applied (usually the maximum current amplitude). In the virtual voltage clamp experiment, we measure conductance directly in this step (which is equivalent as the forcing is the same during each test pulse and eliminated during the normalisation).

**D: Fast/slow inactivation time constant** (p.539 [3]). The protocol to determine inactivation time constants is a simple steptrain of test pulses from a holding potential of  $-140\text{mV}$  for 10s to a series of 100ms test pulses to voltages from  $-50\text{mV}$  to  $-20\text{mV}$  in steps of  $10\text{mV}$ .

The fast and slow inactivation constants are determined by fitting the *decay* part of the current trace (after the peak current) to the equation  $I_{Na} = A_1 e^{-t/\tau_f} + A_2 e^{-t/\tau_s} + A_0$  (p.538 [3]) where  $A$  are amplitude variables,  $t$  is the time and  $\tau_f$  and  $\tau_s$  are the fast and slow time constants of inactivation respectively.

**E: Fast/slow recovery time constant** (p.538 [3]). The time constants of recovery from inactivation were determined using a double pulse protocol. The first pulse is a conditioning pulse for 1000ms to  $-20\text{mV}$  followed by a recovery period to a holding potential between  $-140\text{mV}$  and  $-90\text{mV}$  in steps of  $10\text{mV}$ , of varying length between 2 – 1000ms (this was not specified and we assumed a series of  $t_r = 2^i$  where  $i = 1, 2, \dots, 10$ ). The recovery period is followed by a test pulse identical to the conditioning pulse. We assumed 10s at holding potential between each pair of pulses.

The recovery time constant is measured through a series of processing steps. Firstly, the peak current in the test pulse is normalised to the peak current in the preceding conditioning pulse to give a measurement of proportion of the channel recovery for each recovery time period. This recovery measure is plotted against the recovery time period and the resulting curve is fit to a double exponential equation  $r = A_0 - A_1 e^{-t_r/\tau_r(f)} - A_2 e^{-t_r/\tau_r(s)}$  where  $r$  is the proportion of recovery,  $A$  are amplitude parameters,  $t$

is the recovery time period and  $\tau_{r(f)}$  and  $\tau_{r(s)}$  are the fast and slow recovery time constants respectively. These values are calculated for each holding potential.

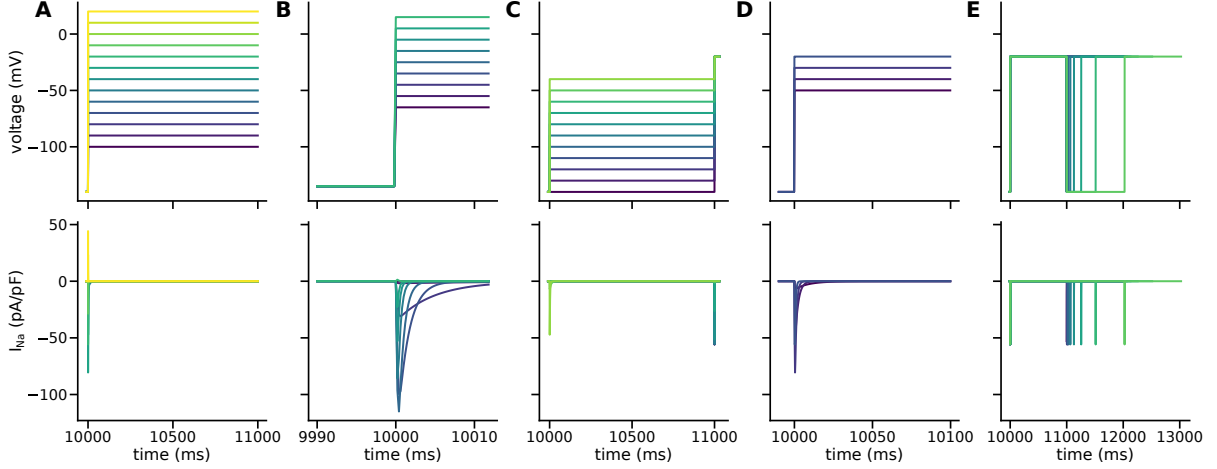

**Supplementary Figure 2:** Voltage steps and current response (from C model) of  $I_{Na}$  protocols. A: steady-state activation, B: time constant of activation, C: steady-state inactivation, D: fast and slow time constants of inactivation, E: fast and slow time constants of recovery from inactivation. The recovery protocol is repeated at multiple holding potentials (only one shown). See text for details of how the current traces are processed into summary statistics.

### S1.3.2 $I_{CaL}$

Experiments by Mewes and Ravens [5] were carried out at room temperature (assumed by authors to be 295K) and external solution with calcium concentration of 1.8mM. Those by Li and Nattel [6] were conducted at 309K with 2.0mM external calcium concentration. Experiments by Sun et al. [7] were completed at room temperature (assumed by authors to be 296K) and external calcium concentration of 1mM. It is difficult to estimate the level of intracellular calcium concentration during these experiments due to the mechanisms of the intracellular calcium stores and buffering. In our virtual voltage clamp experiments, the level of the intracellular calcium was kept constant at the resting value from the published N and C models (72.5nM and 101.3nM respectively) and, for the S model, set to the same value as the C model (101.3nM).

**A, B: Steady-state activation** (p.1309 [5], p.H228 [6]). In Mewes and Ravens [5], steady-state activation was assessed using a conventional steptrain protocol from a holding potential of  $-40\text{mV}$  to 450ms steps between  $-35\text{mV}$  to  $15\text{mV}$  in intervals of  $5\text{mV}$ , with 10s between each pulse. In Li and Nattel [6], the activation curve was generated from the IV curve dataset which used a similar step train protocol. This time the holding potential was  $-80\text{mV}$  and the 300ms test pulses ranged from  $-80\text{mV}$  to  $20\text{mV}$  in steps of  $10\text{mV}$ . Both activation curves were generated as described in  $I_{Na}$  steady-state activation.

**B: Activation time constant** (p.H233 [6]). The single activation time constant value was determined from the current trace evoked during the  $10\text{mV}$  test pulse in the activation protocol from [6]. The activation time constant was estimated by fitting the upstroke of the normalised current trace to  $I_{CaL} = 1 - Ae^{-t/\tau_a}$  where  $A$  is an amplitude parameter,  $t$  is the time and  $\tau_a$  is the activation time constant.

**C: Steady-state voltage-dependent inactivation** (p.H229 [6]). The voltage-dependent steady-state inactivation was assessed using a standard availability protocol. Conditioning pulses to a series of voltages between  $-80\text{mV}$  and  $50\text{mV}$  in steps of  $10\text{mV}$  were followed immediately by a test pulse to  $10\text{mV}$  for 300ms. In [6], there are three datasets using different length of conditioning pulses of either 150ms, 300ms or 1000ms. We use the 1000ms prepulse dataset as this was used for calibration in both modelling papers. The inactivation curve was calculated as in  $I_{Na}$  steady-state inactivation.

**D, E: Fast/slow voltage-dependent inactivation time constant** (p.H229-H230 [6], p.H1628 [7]). Fast and slow inactivation time constants were calculated by fitting a biexponential equation to the decay portion of the current trace during test pulses from a holding potential. In [6], three different holding potentials were used and we use the same as the modelling papers:  $-80\text{mV}$ . Test pulses lasted 300ms

to steps between  $-10\text{mV}$  and  $30\text{mV}$  in intervals of  $10\text{mV}$  (we assume  $10\text{s}$  between pulses). In [7], the holding potential was  $-80\text{mV}$ , test pulses had duration  $1000\text{ms}$  with the same levels as above, and were preceded by a  $500\text{ms}$  pulse to  $-40\text{mV}$ . In both cases, time constants of inactivation were calculated by fitting the decay portion of the current trace during the test pulses to  $I_{\text{CaL}} = A_0 + A_f e^{-t/\tau_f} + A_s e^{-t/\tau_s}$  where  $A$  are amplitude parameters,  $t$  is the time and  $\tau_f$  and  $\tau_s$  are the fast and slow time constants respectively.

**F: Fast/slow voltage-dependent recovery time constant** (p.H229-H230 [6]). Recovery time constants were assessed with a two-pulse protocol as in  $I_{\text{Na}}$  recovery experiments. In this case, the holding potentials were  $-80\text{mV}$ ,  $-60\text{mV}$  and  $-40\text{mV}$  with conditioning and test pulses both to  $10\text{mV}$  for  $300\text{ms}$ . Recovery periods were generated from  $t_r = 2^i$  where  $i = 1, 2, \dots, 11$  based on the range of data points in Fig 4B [6]. The data was processed as in  $I_{\text{Na}}$  recovery experiments with the exception that a single exponential function was used to fit the  $-80\text{mV}$  recovery curve to give a single (slow) recovery time constant.

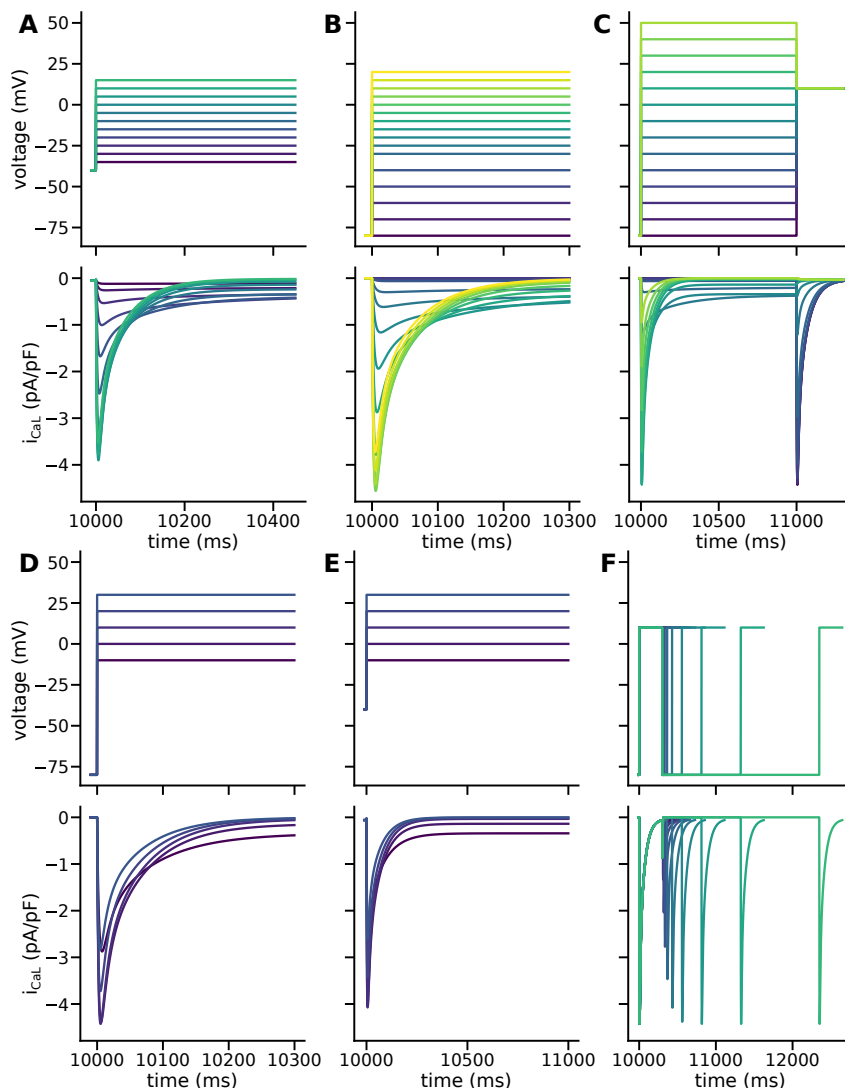

**Supplementary Figure 3:** Voltage steps and current response (from N model) of  $I_{\text{CaL}}$  protocols. A: steady-state activation [5], B: steady-state and time constant of activation [6], C: steady-state inactivation [6], D: fast and slow time constants of inactivation [6], E: fast and slow time constants of inactivation [7], F: fast and slow time constants of recovery from inactivation [6]. The recovery protocol is repeated at multiple holding potentials (only one shown). See text for details of how the current traces are processed into summary statistics.

### S1.3.3 $I_{to}$

Experiments by Shibata et al. [8] and Wang et al. [9] were conducted at room temperature (assumed to be 295K). Firek and Giles [10] used temperature of 306K (33°C). Shibata et al. used an extracellular and pipette potassium concentration of 4.5mM and 150mM respectively, Wang et al. used 5.4mM and 130mM and Firek et al. used 5.4mM and 140mM.

Some data for  $I_{to}$  was extracted directly from the N and C modelling papers [1, 2] as the source of the comparison experimental data plotted was not clear from the text. In these cases, conditions were assumed to be the same as the lab which produced the model. Thus, conditions for the assumed experimental data from Nygren et al. [1] was set to the same conditions as Firek and Giles [10] above, and data from Courtemanche et al. [2] was assumed to have been collected at the conditions in Wang et al. [9].

**A, B: Steady-state activation** (p. H1776 [8], p.1065 [9]). In Shibata et al. [8], steady-state activation was determined by holding at a potential of  $-60\text{mV}$  for 20s, then depolarising for 15ms to a step between  $-30\text{mV}$  to  $80\text{mV}$ , and finally stepping to  $-40\text{mV}$  for 100ms. The activation curve was generated by recording the peak current amplitude in the final step (the ‘tail’ current). Wang et al. [9] used a standard steady-state activation protocol with a holding potential of  $-80\text{mV}$  to a series of test potentials between  $-40\text{mV}$  and  $50\text{mV}$  and measured the peak current during the 1000ms depolarising step (before processing as above for  $I_{Na}$ ).

**C: Activation time constant** (p.H305 [2]). Activation time constant data corresponding to that plotted in the modelling paper could not be found in the cited experimental source [9]. A simple steptrain protocol as described in [9] was assumed with a holding potential of  $-50\text{mV}$  and 100ms test pulses. The activation time course of  $I_{to}$  was fitted to a single exponential equation:  $I_{to} = A_0 - Ae^{-t/\tau_a}$  where  $A$  parameters are amplitudes,  $t$  is the time course and  $\tau_a$  is the activation time constant.

**D: Deactivation time constant** (p.H305 [2]). The deactivation time constant data source is also uncertain and it is assumed to use a similar protocol as in Fig. 9A in Wang et al. [9]. This protocol holds the membrane potential at  $-50\text{mV}$  for 20s before applying a 10ms conditioning pulse to  $50\text{mV}$ . This is followed by a test pulse to elicit a tail current, which is fit to a single exponential (same as the activation time constant above) to determine the deactivation time constant.

**E, F: Steady-state inactivation** (p.34 [10], p.1065 [9]). In Firek and Giles, a standard steady-state availability protocol was applied as described in more detail in  $I_{Na}$  steady-state inactivation. The holding potential is  $-80\text{mV}$ , followed by a 400ms conditioning pulse to levels between  $-80\text{mV}$  and  $16\text{mV}$ , and finally a 400ms test pulse to  $0\text{mV}$  to activate the outward current. Wang et al. [9] similarly uses a standard availability protocol with the same holding potential followed by 1000ms conditioning pulse to a range of voltages between  $-90\text{mV}$  and  $30\text{mV}$  followed by a 1000ms test pulse to  $60\text{mV}$ . Output was processed into summary statistics as described in  $I_{Na}$  steady-state inactivation.

**G, H: Inactivation time constant** (p.66 [1], p.H305 [2]). It was not clear in either N or C model where experimental comparison data of time constants of inactivation for  $I_{to}$  were obtained from. Consequently, simple protocols were assumed based on single-pulse protocols in experimental papers originating from the same labs. For [1], a single pulse protocol from a holding potential of  $-80\text{mV}$  to 400ms test pulses between  $0\text{mV}$  and  $40\text{mV}$  was applied and the decay phase of the current trace fit to a single exponential equation as above for activation time constants. For [2], a similar protocol was assumed based on [9] with a holding potential of  $-50\text{mV}$  and 100ms test pulses to between  $-40\text{mV}$  and  $50\text{mV}$ .

**I, J: Recovery time constant** (p.66 [1], p.H305 [2]). Similarly to the inactivation time constant data, it was unclear where the recovery data was obtained from for both N and C models. For the N model, we assume the recovery protocol in [8] was used. This is a standard two-pulse recovery protocol with holding potentials of  $-100\text{mV}$ ,  $-80\text{mV}$  and  $-60\text{mV}$  and 100ms test pulses to  $20\text{mV}$ . For the C model, we assume the protocol in [9] was used with holding potential between  $-60\text{mV}$  and  $40\text{mV}$  and 200ms test pulses to  $50\text{mV}$ .



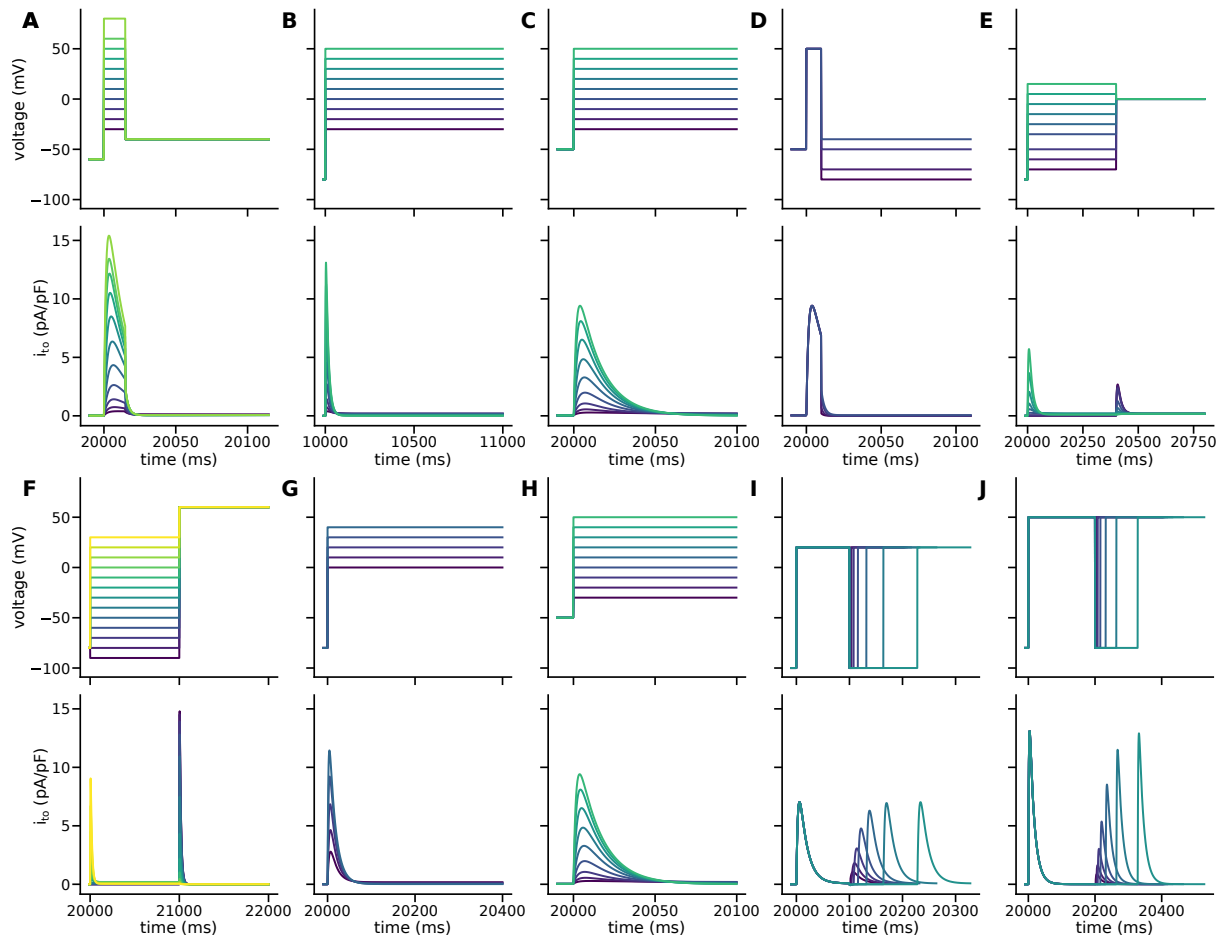

**Supplementary Figure 4:** Voltage steps and current response (from N model) of all  $I_{t_0}$  protocols. From left to right: A: steady-state activation [8], B: steady-state activation [9], C: activation time constants [2], D: deactivation time constants [2], E: steady-state inactivation [10], F: steady-state inactivation [9], G: time constant of inactivation [1], H: time constant of inactivation [2], I: time constant of recovery from inactivation [1], J: time constant of recovery from inactivation [2]. The recovery protocols are repeated at multiple holding potentials (only one shown for each). See text for details of how the current traces are processed into summary statistics.

### S1.3.4 $I_{Kur}$

Experiments by Wang et al. [9] and Firek and Giles [10] use the same conditions stated above for  $I_{to}$ . As before, in some cases it was unclear where the comparison data in the modelling papers was obtained from. Details are given in the following sections.

**A: Steady-state activation, activation time constant** (p.1069 [9]).  $I_{Kur}$  was measured from a holding potential of  $-50\text{mV}$  followed by a 1s prepulse to  $50\text{mV}$  (experimentally used to inactivate the  $I_{to}$  current which would otherwise interfere with isolating  $I_{Kur}$ ). The potential is returned to  $-50\text{mV}$  for 20ms before being stepped to a range of 100ms test pulses between  $-40\text{mV}$  to  $50\text{mV}$  each followed by a repolarising pulse to  $-10\text{mV}$ .  $I_{Kur}$  was measured as the peak current in the final repolarising pulse and the activation curve determined as previously described for  $I_{Na}$  steady-state activation. The activation time constants were determined by fitting the time course of  $I_{Kur}$  trace during the test pulses to a single exponential function as described above.

**B: Deactivation time constant** (p.305 [2]). As it was not clear where the data points were obtained from, the protocol from Fig. 9 in [9] was assumed to have been used. This is the same protocol as described in deactivation time constant for  $I_{to}$ .

**C, D: Steady-state inactivation** (p.34 [10], p.1068 [9]). For Firek and Giles [10], the protocol was the same as the steady-state inactivation protocol described for steady-state inactivation of  $I_{to}$  with an increase of the length of the conditioning pulse from 400ms to 2500ms.  $I_{Kur}$  was measured as the steady-state current at the end of the test pulse. In Wang et al. [9], steady-state inactivation is measured from the steady-state current at the end of a 2000ms test pulse to  $40\text{mV}$  after a 1000ms conditioning pulse from a range of voltages. The holding potential was  $-60\text{mV}$ .

**E, F: Inactivation time constant** (p.66 [1], p.H305 [2]). It was unclear where the experimental data points from the N model paper came from. We assume they are generated from the protocol used in [10] from the same lab. This protocol is a simple 400ms step to a range of potentials from a holding potential of  $-80\text{mV}$ . In [10], the current decay is fit to a double exponential equation in order to separate  $I_{to}$  and  $I_{Kur}$  decay rates. As in the virtual voltage clamp there is only  $I_{Kur}$ , we fit the current decay to a single exponential.

Similarly for the C model, we assume a similar protocol as in [9] was used. This is a simple 2000ms step to a range of test potentials from a holding potential of  $-50\text{mV}$ . The decay portion of the current trace is fit to a single exponential function as above.

**G: Recovery time constant** (p.66 [1]). As previously for  $I_{to}$ , we assume that the recovery protocol from [8] was used to determine a recovery time constant for  $I_{Kur}$ . The protocol is as described for  $I_{to}$  recovery time constant.

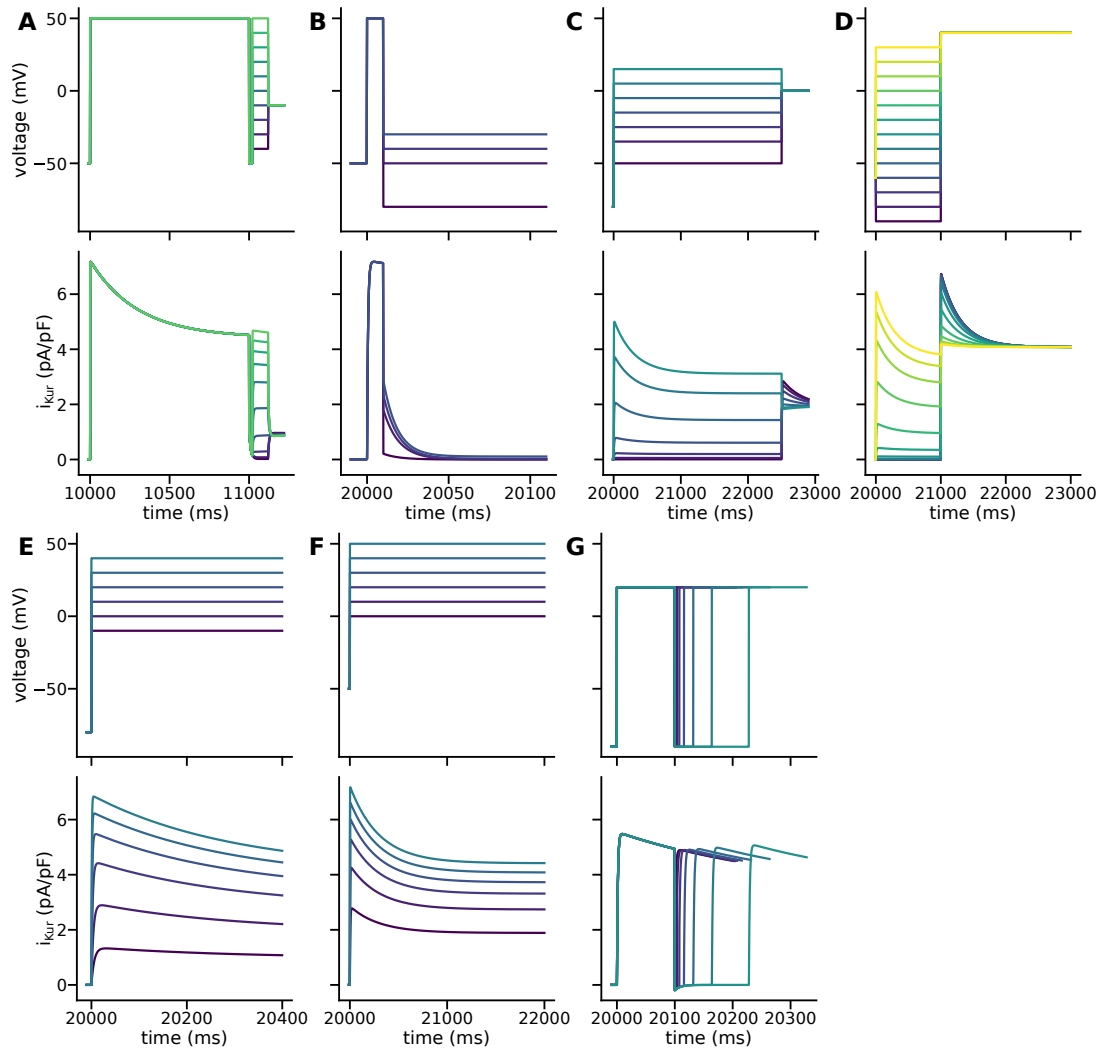

**Supplementary Figure 5:** Voltage steps and current response (from N model) of all  $I_{Kir}$  protocols. A: steady-state activation and activation time constant [9], B: deactivation time constants [2], C: steady-state inactivation [10], D: steady-state inactivation [9], E: time constant of inactivation [1], F: time constant of inactivation [2], G: time constant of recovery from inactivation [1]. See text for details of how the current traces are processed into summary statistics.

## S2 Approximate Bayesian computation

Formally, ABC approximates the true parameter posterior distribution  $P(\lambda|\mathbf{D})$  by  $P(\lambda|\rho(\hat{\mathbf{D}}, \mathbf{D}) \leq \epsilon)$  where  $\mathbf{D}$  are the experimental data,  $\rho$  is the chosen distance function,  $\hat{\mathbf{D}}$  is the model summary statistics and  $\epsilon$  is the threshold value. We use the Toni ABC sampler based on sequential Monte Carlo to infer our parameter posterior distributions [12]. In this sampler, the ABC process above is repeated through a number of iterations with reducing  $\epsilon$ . A population of parameter samples, referred to as ‘particles’, are propagated through each iteration and represent a discrete surrogate to the continuous posterior distribution.

At each iteration of the algorithm, the previous population of particles are perturbed slightly, by a multivariate Gaussian kernel, and used as the prior distribution for the current iteration.  $\epsilon$  is reduced over iterations and chosen as the median distance of samples from the previous iteration. The particle population number is set according to the number of parameters being constrained in the experiment by considering the size of the parameter sampling hyperspace and assuming at least two particles in each dimension. A limit of 10000 particles is enforced due to computational demands. The algorithm terminates when less than 1% of parameter samples are accepted in a given iteration indicating the algorithm is struggling to improve on the current optimum. This criterion is chosen over termination at an absolute value of the distance metric termination used in other studies due to differences in number of model parameters and availability of data between experiments.

To compare our model summary statistics to the experimental data (which include error measurements at each point), we use a weighted Euclidean distance function

$$\rho(\hat{\mathbf{D}}, \mathbf{D}) = \left[ \sum_{i=0}^M \left( \frac{\hat{D}_i - D_i}{w_i} \right)^2 \right]^{1/2}, \quad (1)$$

$$w_i = \max(\sigma_i, \delta) n_{\text{exp}|i},$$

where  $w_i$  are the weights for each data point,  $\sigma_i$  is the standard deviation associated with the error at each data point,  $\delta$  is a regularisation factor applied when weights are close to zero, and  $n_{\text{exp}|i}$  is the number of data points within the experiment. In this work  $\delta$  was set to 0.05. Once generated, the weights are also mean-normalised to improve convergence of the ABC algorithm. The choice of distance function reduces the weighting of data points based on the magnitude of experimental uncertainty. This allows us to use information of which experimental data points we are relatively more confident about during the model calibration, propagating some of the experimental uncertainties through to this stage in the model development [13]. In some cases for  $I_{\text{to}}$  and  $I_{\text{Kur}}$ , it was not clear in the modelling paper where the data were obtained. In these cases, the points displayed in the figure from the modelling paper were digitised and 10% standard deviation error assumed (based on the error of similar measurements given in [9]).

Additionally, we account for the fact that we are simultaneously calibrating to multiple datasets by weighting according to the number of data points in a specific experiment. This provides balance between the different types of channel behaviour, rather than favouring an experiment with a greater number of data points. Each dataset is normalised to the maximum value in that experiment to avoid preference towards datasets with measurements at a larger scale in the ABC loss function.

A uniform prior distribution is used for each model parameter in the first iteration. The width of this prior is set to be sufficiently wide to cover the range of physiological possibilities. After convergence, the parameter posterior distributions are inspected and, if observed to be restricted by the lower or upper limit of the prior, the calibration is re-started with a wider prior. For the S model, prior ranges are set as in [14].

## S3 Additional results

### S3.1 Gating functions for calibrations to original and unified datasets

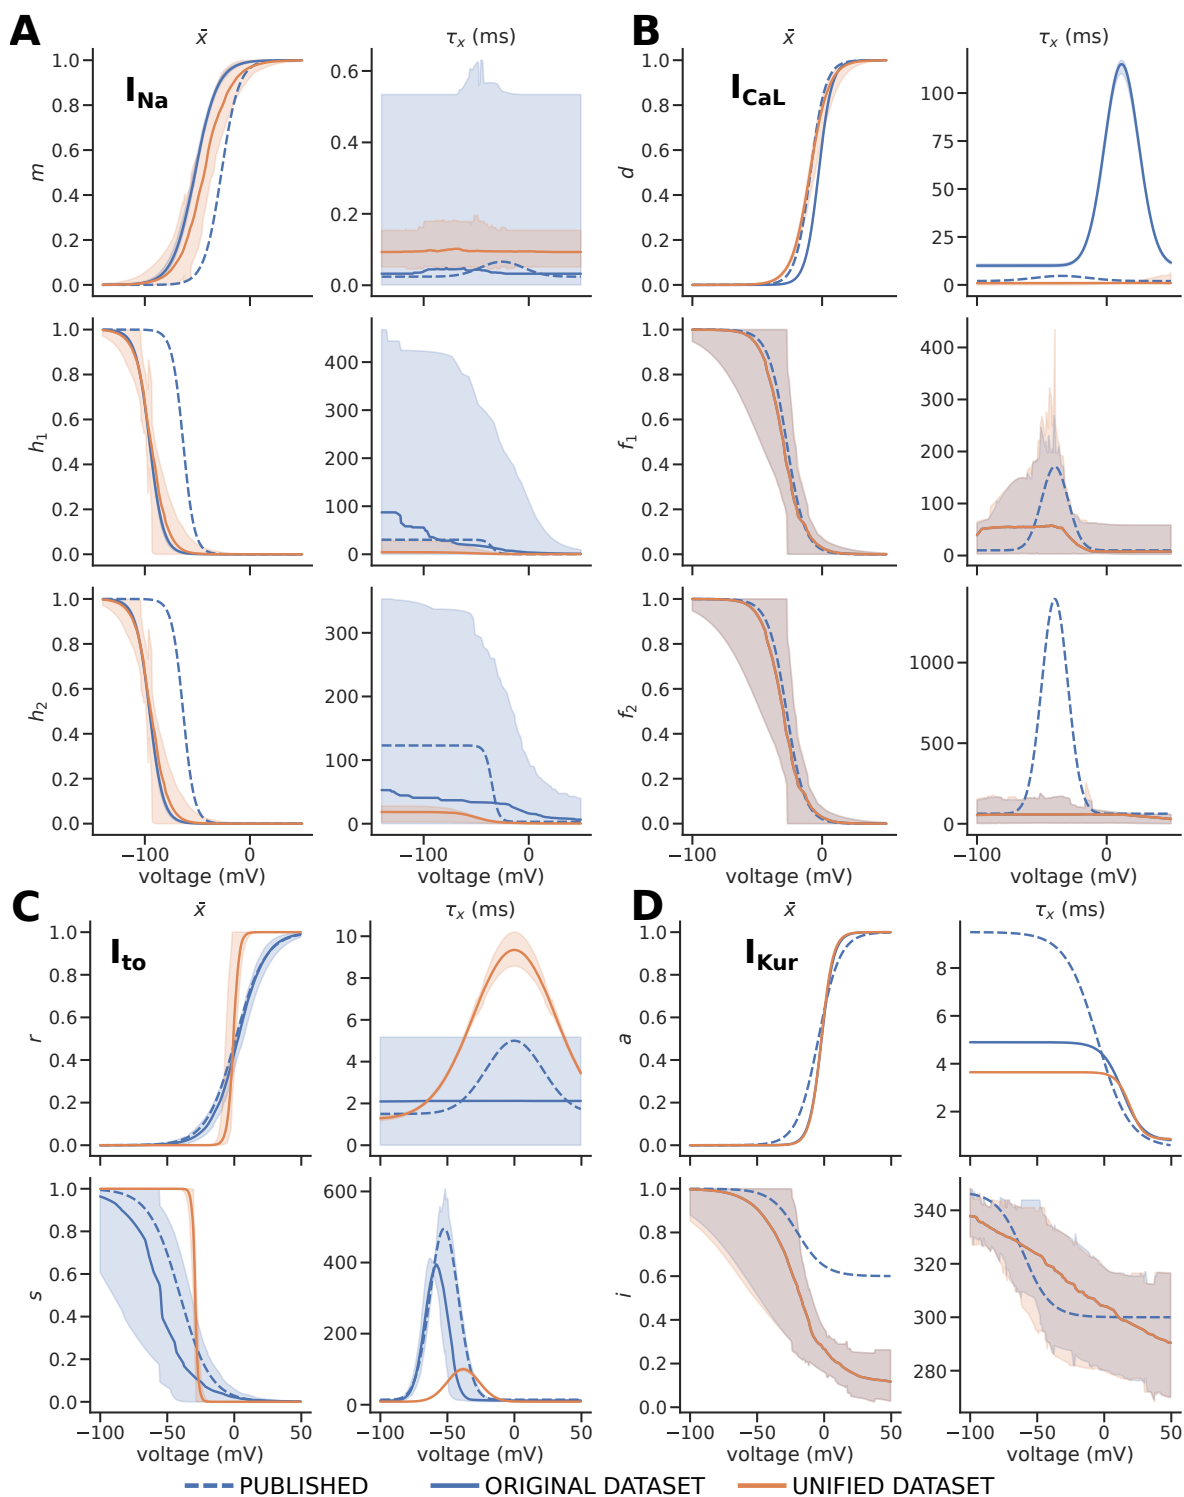

**Supplementary Figure 6:** A-D Steady-state and time constant functions for each channel of the N model using original calibration dataset and unified dataset. Blue refers to original dataset and orange to unified dataset. Data displayed as median line with shading representing 89% HDPI of 100 samples from the parameter posterior distribution.

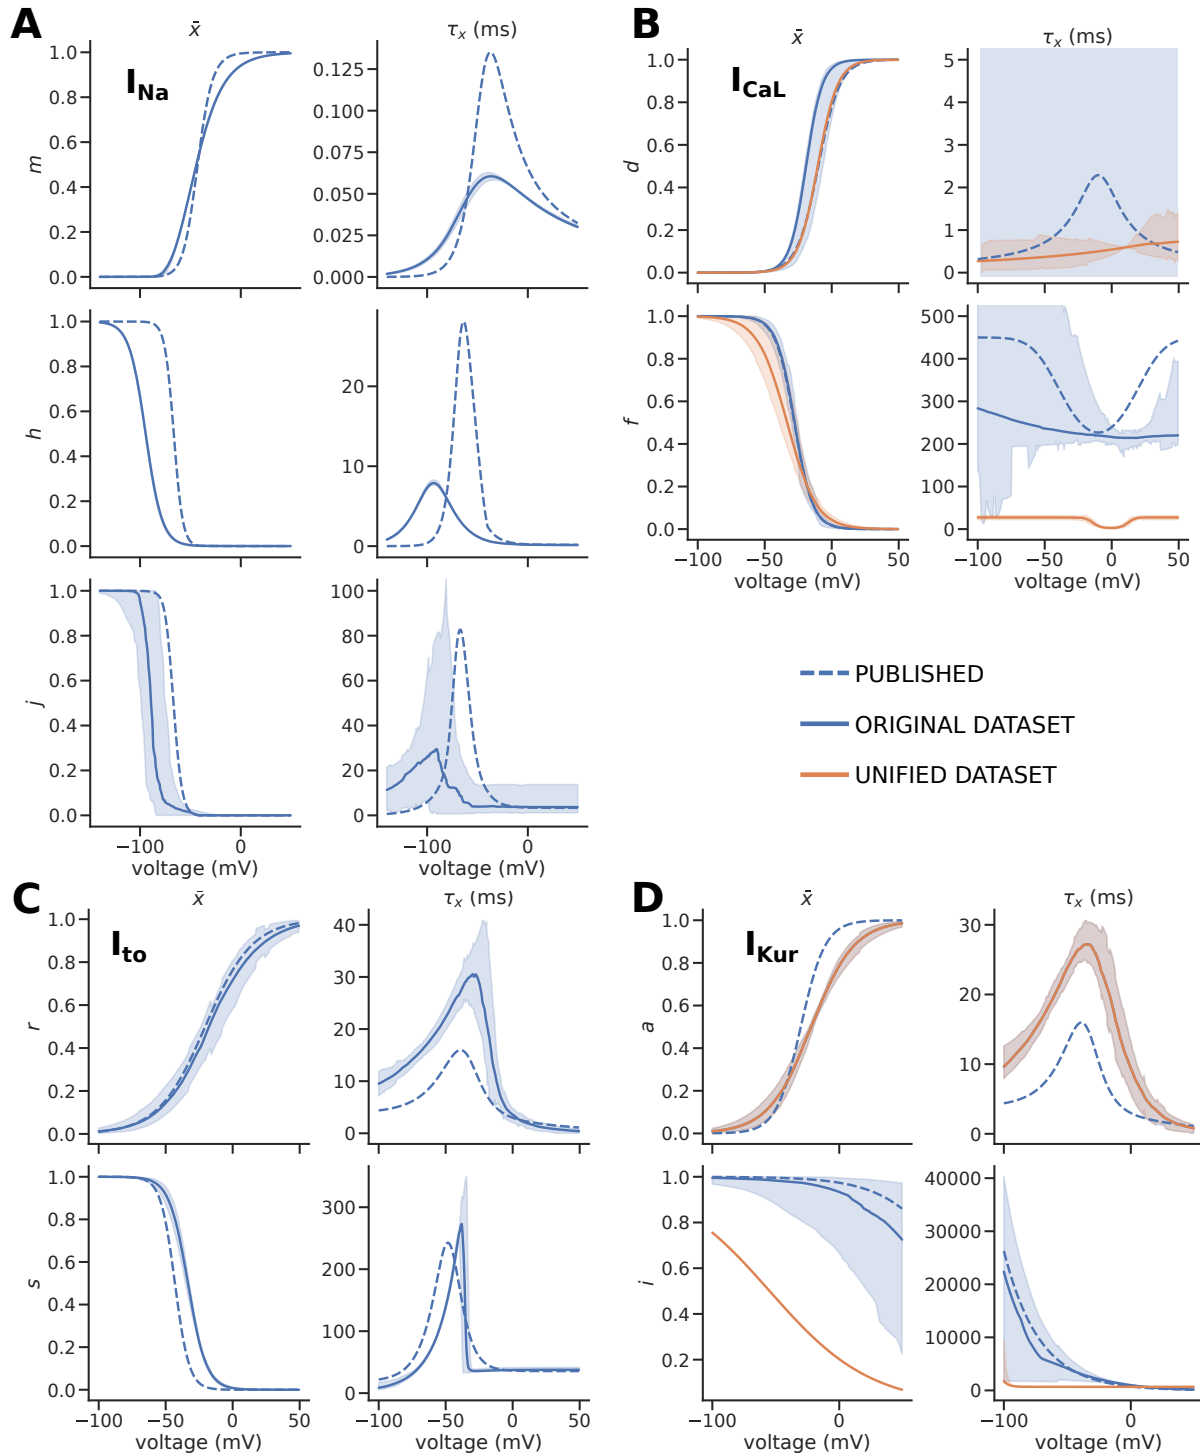

**Supplementary Figure 7: A-D** Steady-state and time constant functions for each channel of the C model using original calibration dataset and unified dataset. Blue refers to original dataset and orange to unified dataset. Data displayed as median line with shading representing 89% HDPI of 100 samples from the parameter posterior distribution. Note for  $I_{Na}$  and  $I_{to}$  the original and unified dataset are the same.

### S3.2 $I_{CaL}$

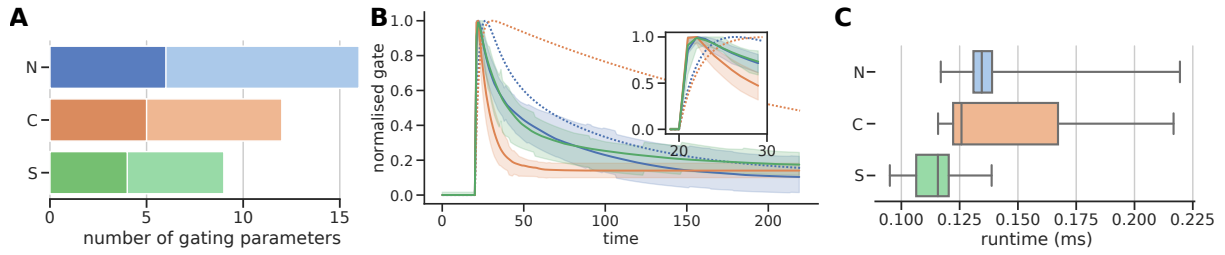

**Supplementary Figure 8:** **A** Number of gating parameters in equations for each  $I_{CaL}$  model, separated into activation (dark) and inactivation (light). **B** Example traces from each model generated from the last step of a train of 100 steps from  $-80$  mV to  $-10$  mV for 200 ms at a rate of 1 Hz using 100 samples from the parameter posterior distributions. Higher detail of the activation portion of the trace is shown in the inset plot. Output is summarised as median line with shading representing 89% HDPI. Dashed lines indicate the response of the published N and C models. **C** Boxplot comparing runtime of the simulation to generate each trace in B for each model.

### S3.3 $I_{to}$

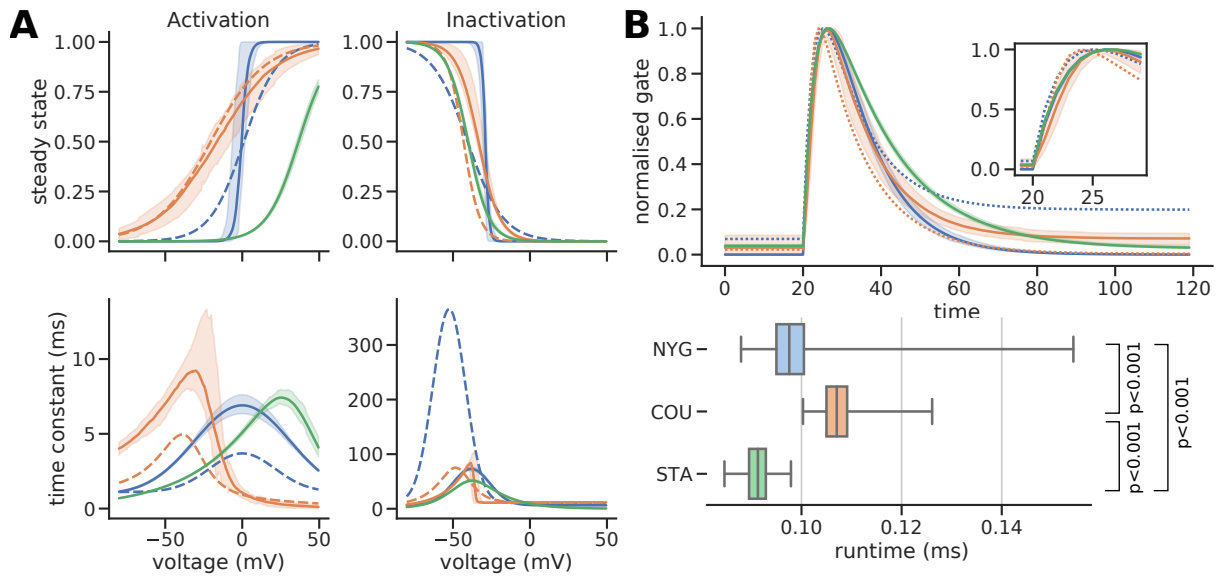

**Supplementary Figure 9:** **A** Steady-state and time constant functions for  $I_{to}$  model. Plotted as median line with shading indicated 89% HDPI from 100 samples from the parameter posterior distribution. Dashed lines indicate the published values. **B** Example traces from each model generated from the last step of a pulse train of 100 steps from  $-50$  mV to  $-10$  mV for 100 ms at a rate of 1 Hz using samples in A. Higher detail of activation portion of trace is shown in inset. Dashed lines indicate the published N and C models. The boxplot below compares runtime of the simulations to generate the above traces for each model.

### S3.4 $I_{Kur}$

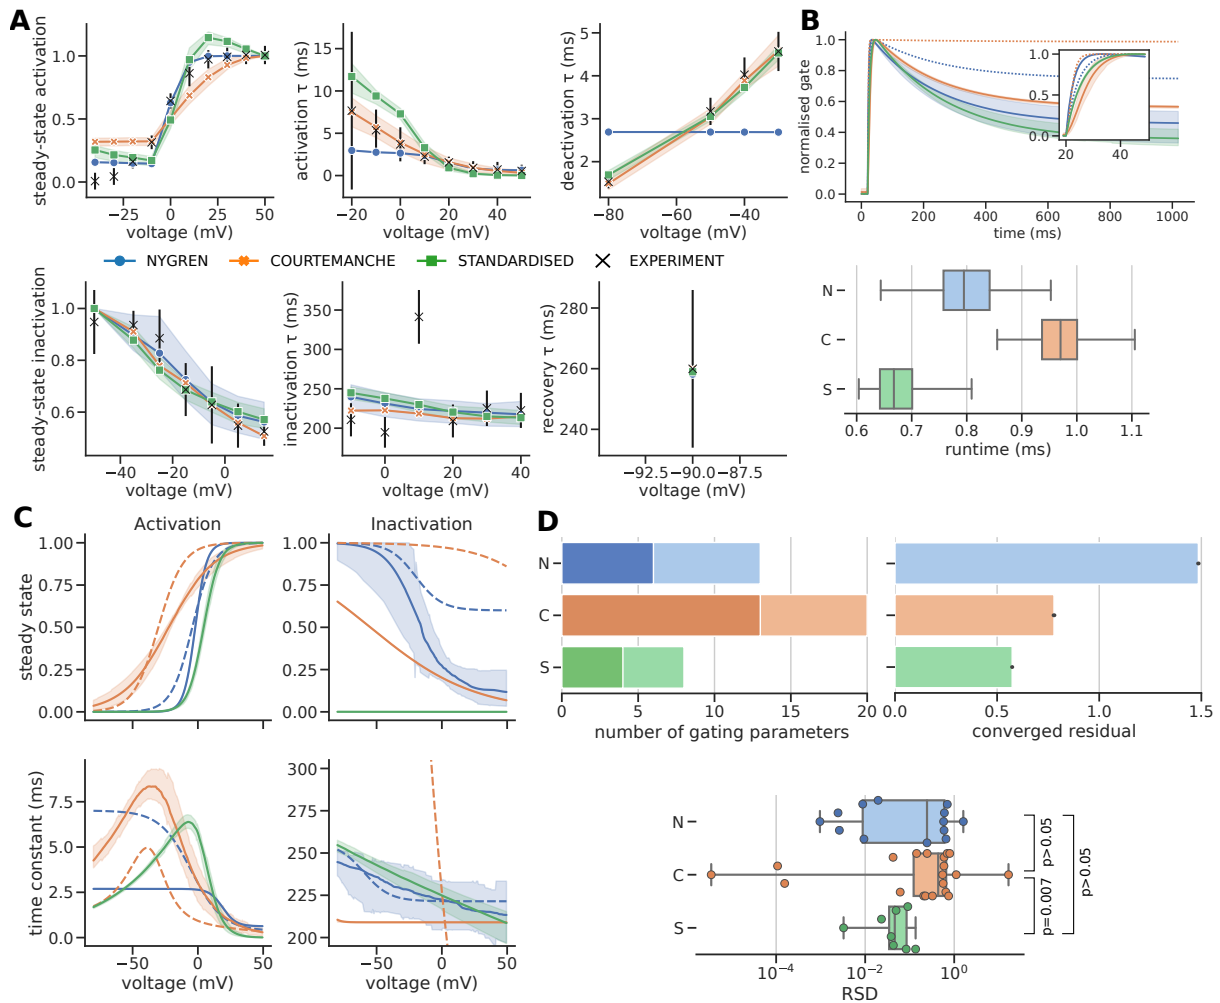



### S3.5 Goodness-of-fit residuals

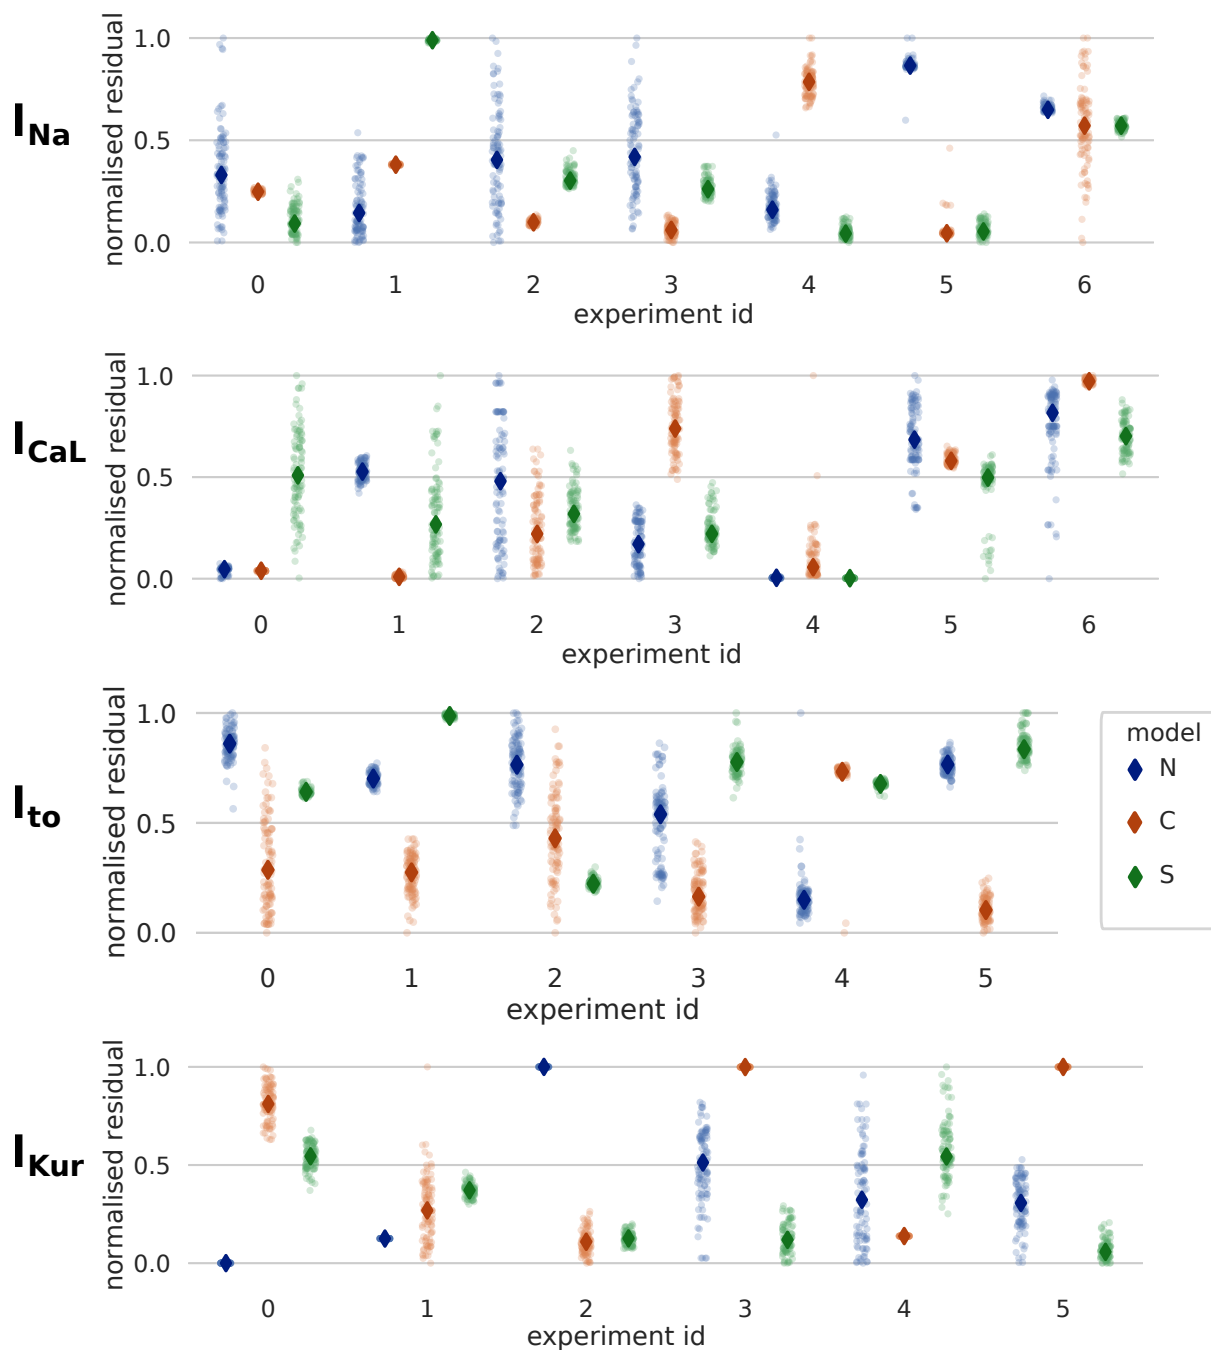

**Supplementary Figure 11:** Min-max normalised residuals by experiment and model. Experiment ID follows order of appearance in main figure for that channel.

### S3.6 Action potential response

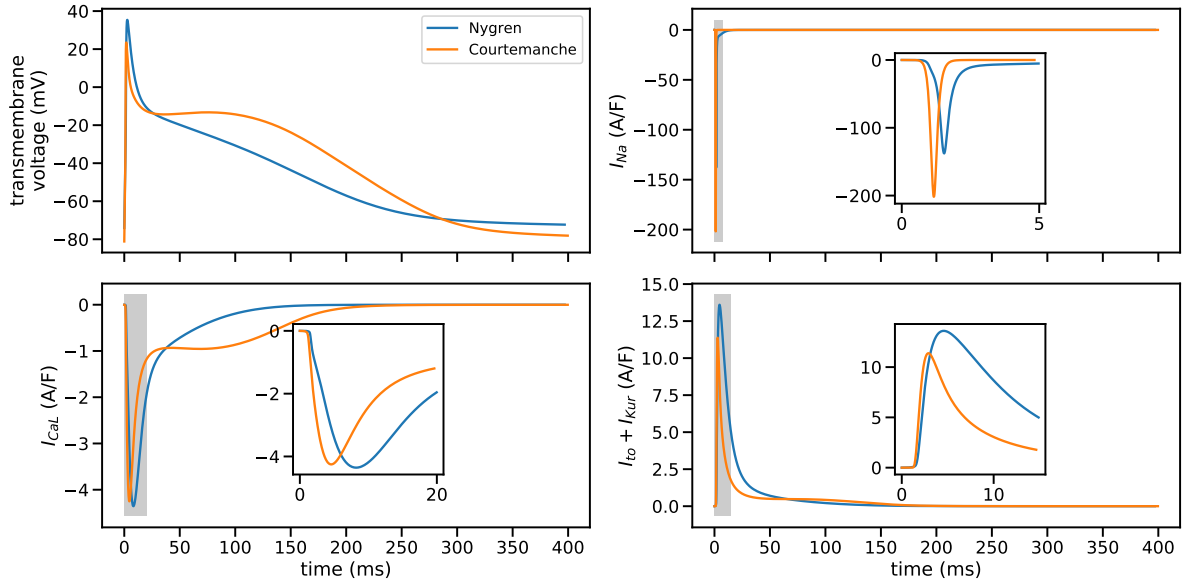

**Supplementary Figure 12:** Comparison of action potential morphology and major ion currents underlying the action potential in published N and C models of the human atrial cardiomyocyte. Inset graphs show more detail of the shaded time portion in the main graphs. Action potentials were stimulated by 100s of pacing at a basic cycle length of 1 s using a stimulus current of 40 pA/pF for 1 ms. The plot shows the final pulse from the pulse train protocol.

| Model | Measure (units) | Published | $I_{CaL}$ (89% HDPI) | $I_{to}$ (89% HDPI)  | $I_{Kur}$ (89% HDPI) |
|-------|-----------------|-----------|----------------------|----------------------|----------------------|
| N     | RP (mV)         | -74.1     | -73.7 (-76.3, -17.5) | -72.7 (-72.7, -72.5) | -62.2 (-63.0, -61.4) |
|       | AMP (mV)        | 114.3     | 113.4 (39.0, 115.8)  | 113.4 (113.1, 113.6) | 95.0 (94.2, 95.8)    |
|       | APD90 (ms)      | 223.2     | 217.5 (16, 295)      | 271 (266, 280)       | 298 (295, 302)       |
| C     | RP (mV)         | -81.2     | -81.7 (-81.8, -81.6) | -81.3 (-81.4, -81.2) | -81.6 (-81.8, -80.9) |
|       | AMP (mV)        | 110.9     | 112.5 (112.3, 112.9) | 109.4 (107.5, 110.9) | 111.2 (109.8, 111.8) |
|       | APD90 (ms)      | 288.5     | 211 (189, 246)       | 257 (247, 266)       | 237.5 (190, 304)     |
| N+S   | RP (mV)         | -74.1     | -76.3 (-76.7, -70.3) | -73.2 (-73.2, -73.1) | -62.2 (-66.1, -58.0) |
|       | AMP (mV)        | 114.3     | 118.6 (106.1, 120.3) | 110.8 (110.6, 111.0) | 93.9 (88.2, 98.8)    |
|       | APD90 (ms)      | 223.2     | 172.5 (131, 233)     | 248 (245, 249)       | 286 (283, 293)       |
| C+S   | RP (mV)         | -81.2     | -81.5 (-82.0, -27.1) | -81.2 (-81.2, -81.2) | -81.9 (-82.0, -81.8) |
|       | AMP (mV)        | 110.9     | 111.7 (39.4, 112.9)  | 109.2 (109.1, 109.3) | 107.6 (106.4, 108.9) |
|       | APD90 (ms)      | 288.5     | 192 (35, $\infty$ )  | 267 (264, 270)       | 179.5 (150, 206)     |

**Supplementary Table 2:** Effect on full AP of using parameter posterior distributions to calibrate channel models. Measurements taken are resting potential (RP), action potential amplitude (AMP) and action potential duration to 90% repolarisation (APD90). N: Nygren model, C: Courtemanche model, +S: represents the indicated channel was replaced with the standardised form in the full AP model.

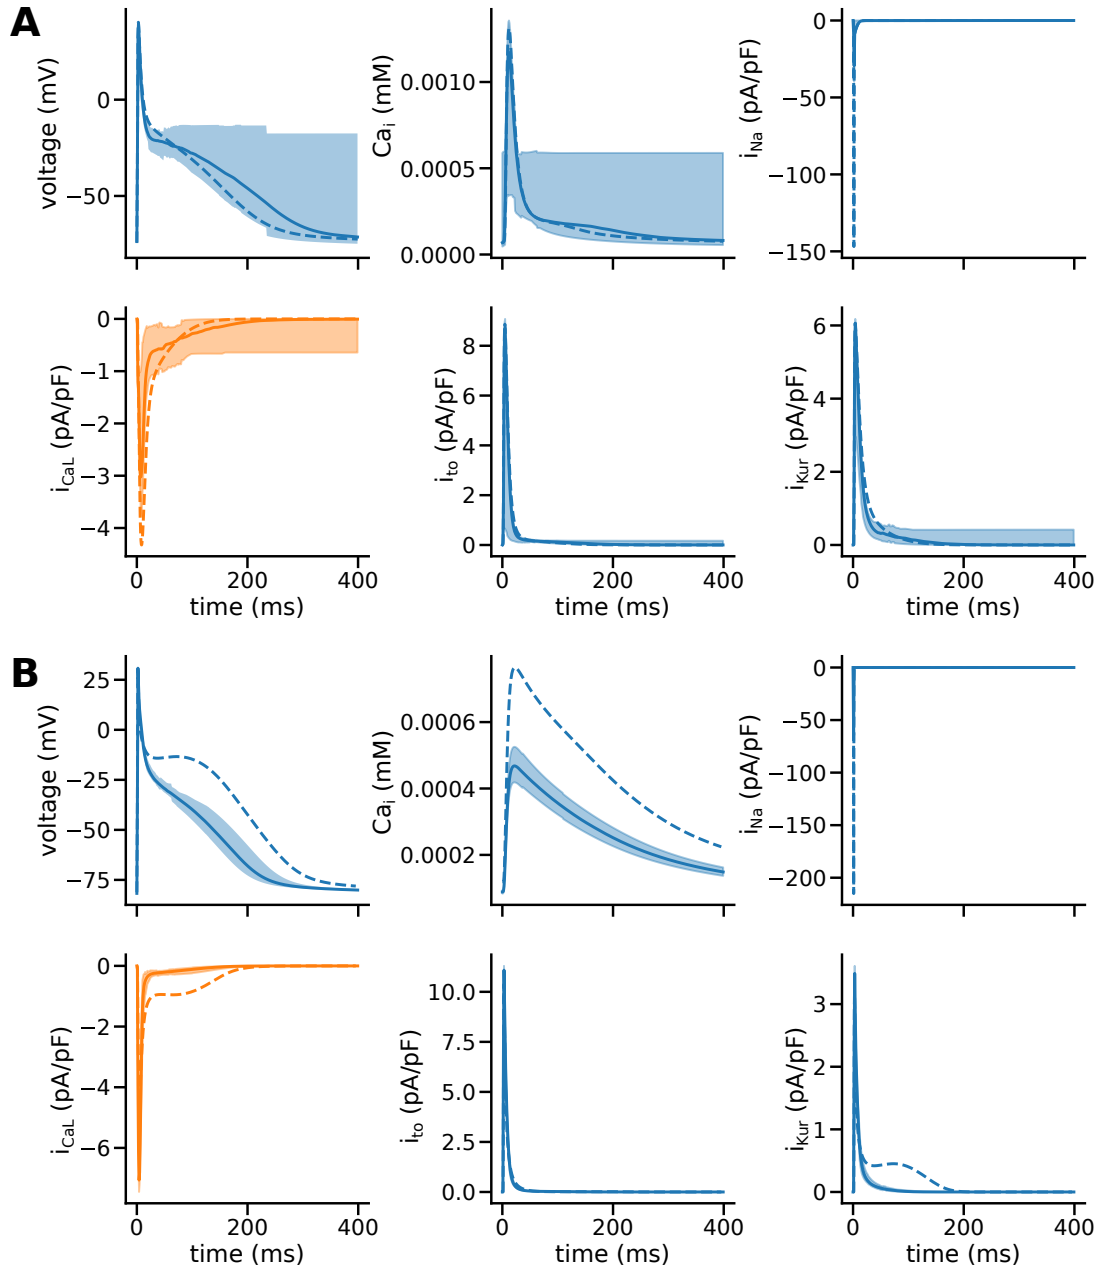

**Supplementary Figure 13:** Action potential, major currents and intracellular calcium concentrations for A: N model and B: C model. Traces using published parameters are represented with dashed lines. Samples from the full cell model with  $I_{CaL}$  replaced by the unified recalibrated parameterisation are displayed as a median line with 89% high density posterior intervals. The orange plot highlights the channel that is recalibrated using the parameter posterior distribution from ABC. All other model parameters are unchanged from published values.

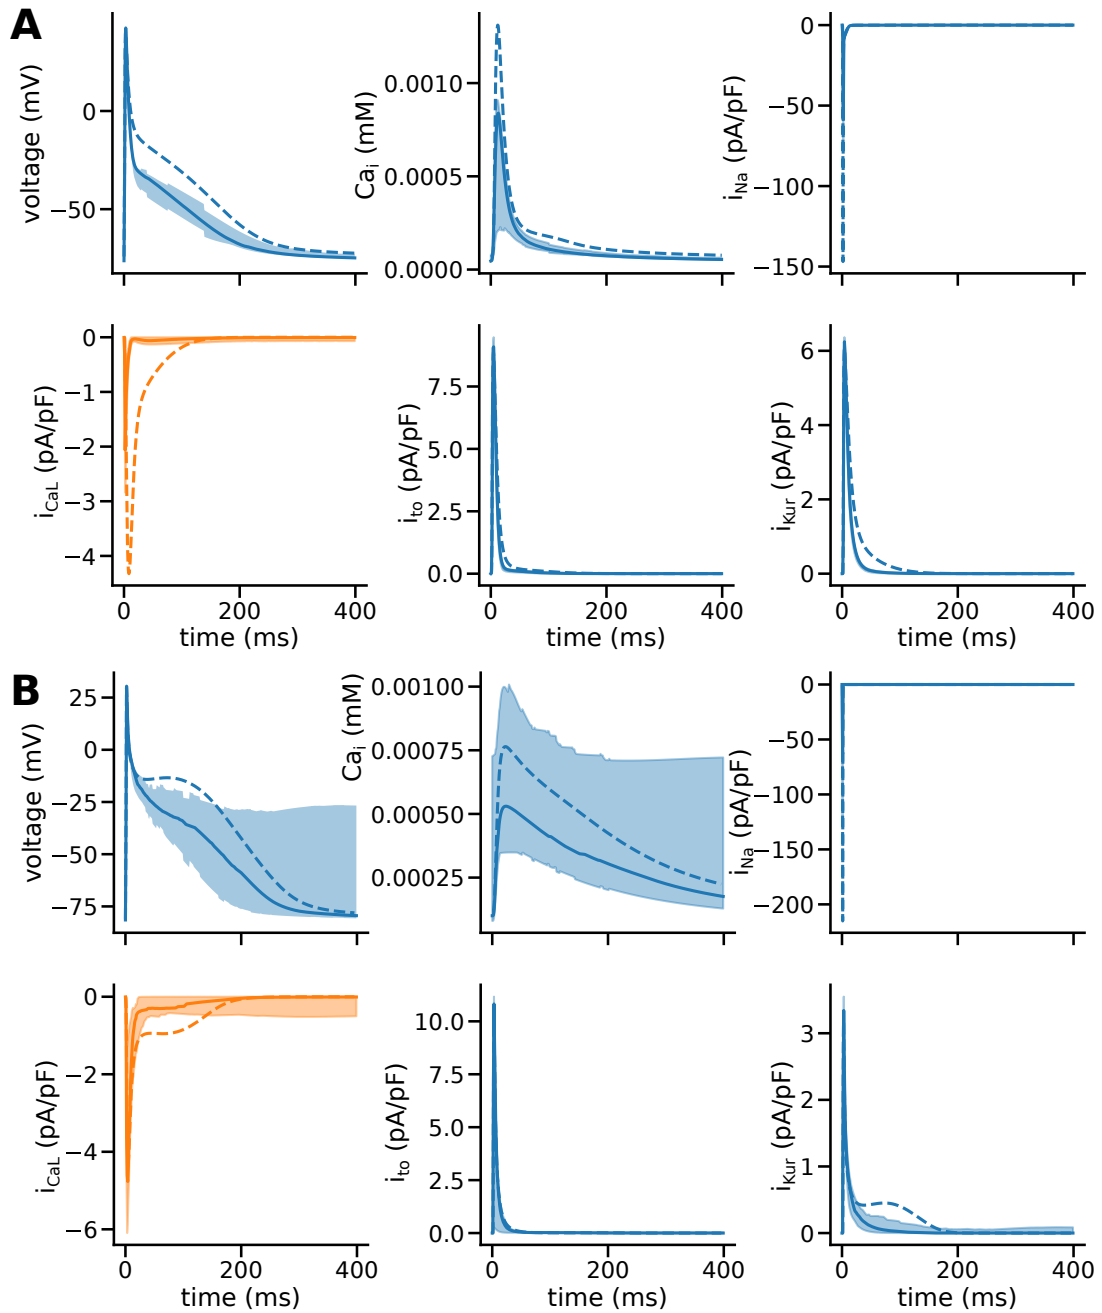

**Supplementary Figure 14:** Action potential, major currents and intracellular calcium concentrations for A: N model and B: C model, with the S form of  $I_{CaL}$  replacing the original form. Traces using published parameters are represented with dashed lines. Samples from the full cell model with  $I_{CaL}$  replaced by the unified recalibrated parameterisation are displayed as a median line with 89% high density posterior intervals. The orange plot highlights the channel that is replaced with the standardised model and using the parameter posterior distribution from ABC. All other model parameters are unchanged from published values.

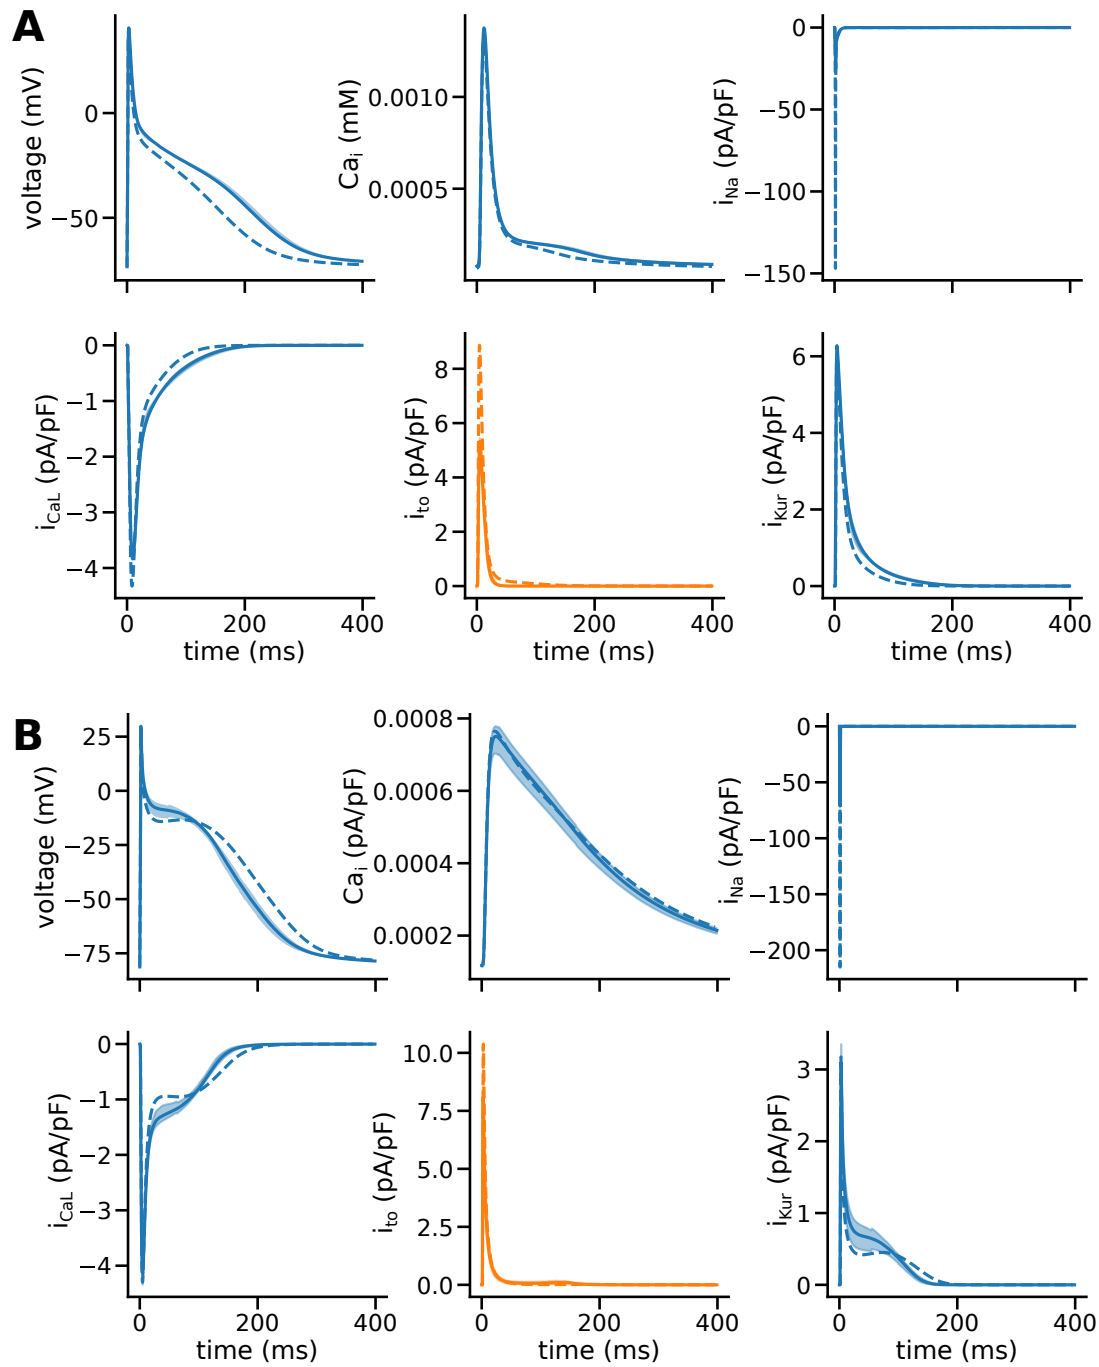

**Supplementary Figure 15:** Action potential, major currents and intracellular calcium concentrations for A: N model and B: C model. Traces using published parameters are represented with dashed lines. Samples from the full cell model with  $I_{to}$  replaced by the unified recalibrated parameterisation are displayed as a median line with 89% high density posterior intervals.. The orange plot highlights the channel that is recalibrated using the parameter posterior distribution from ABC. All other model parameters are unchanged from published values.

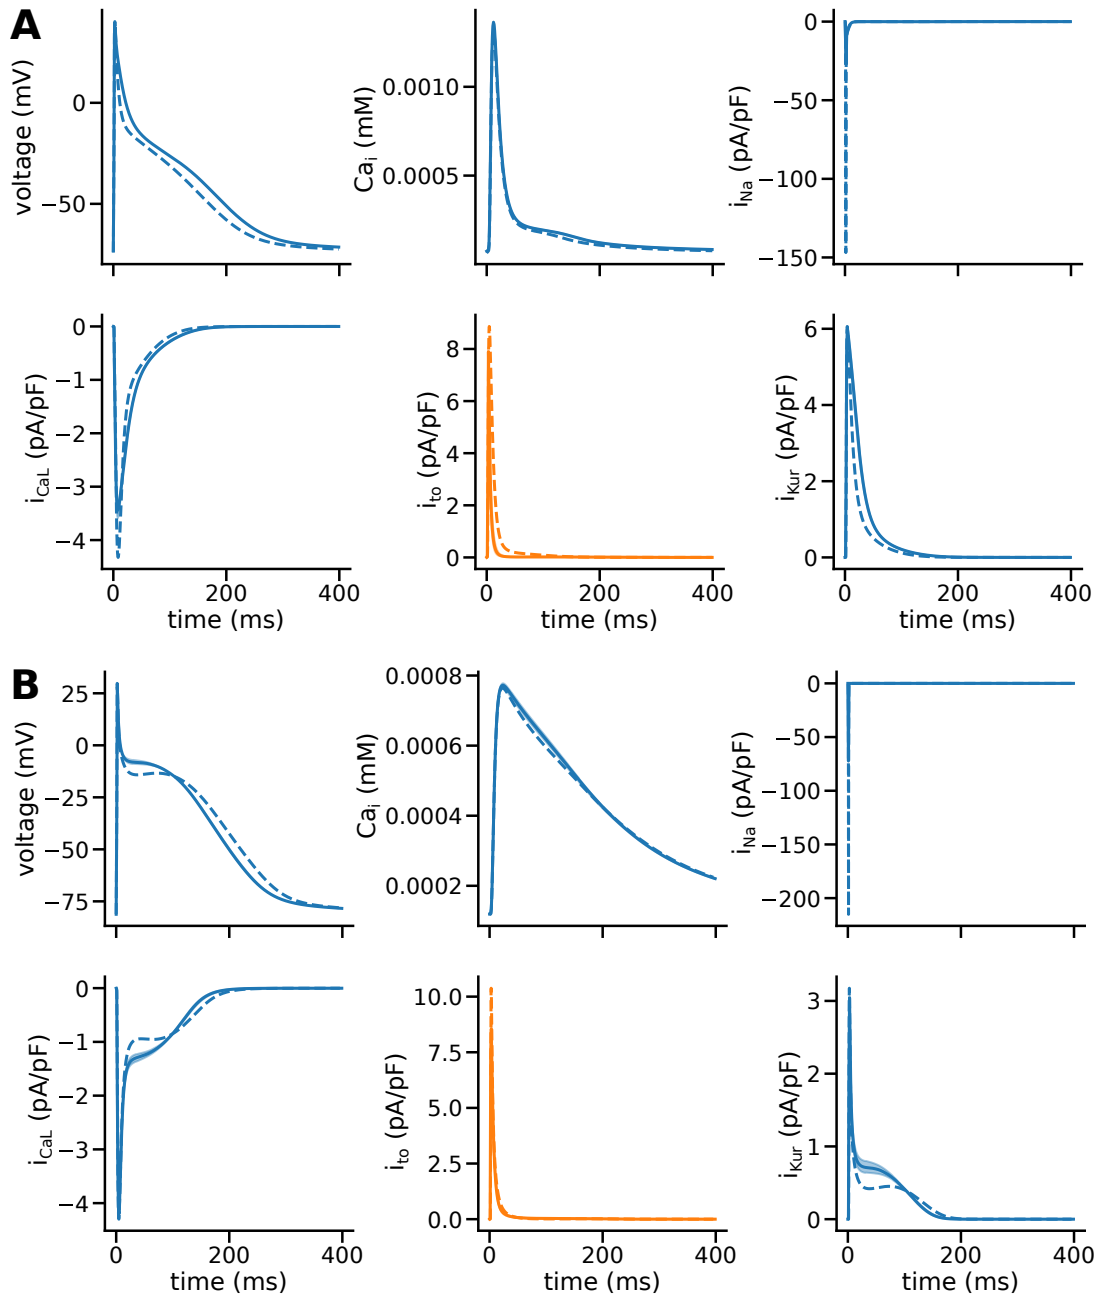

**Supplementary Figure 16:** Action potential, major currents and intracellular calcium concentrations for A: N model and B: C model, with the S form of  $I_{to}$  replacing the original form. Traces using published parameters are represented with dashed lines. Samples from the full cell model with  $I_{to}$  replaced by the unified recalibrated parameterisation are displayed as a median line with 89% high density posterior intervals. The orange plot highlights the channel that is replaced with the standardised model and using the parameter posterior distribution from ABC. All other model parameters are unchanged from published values.

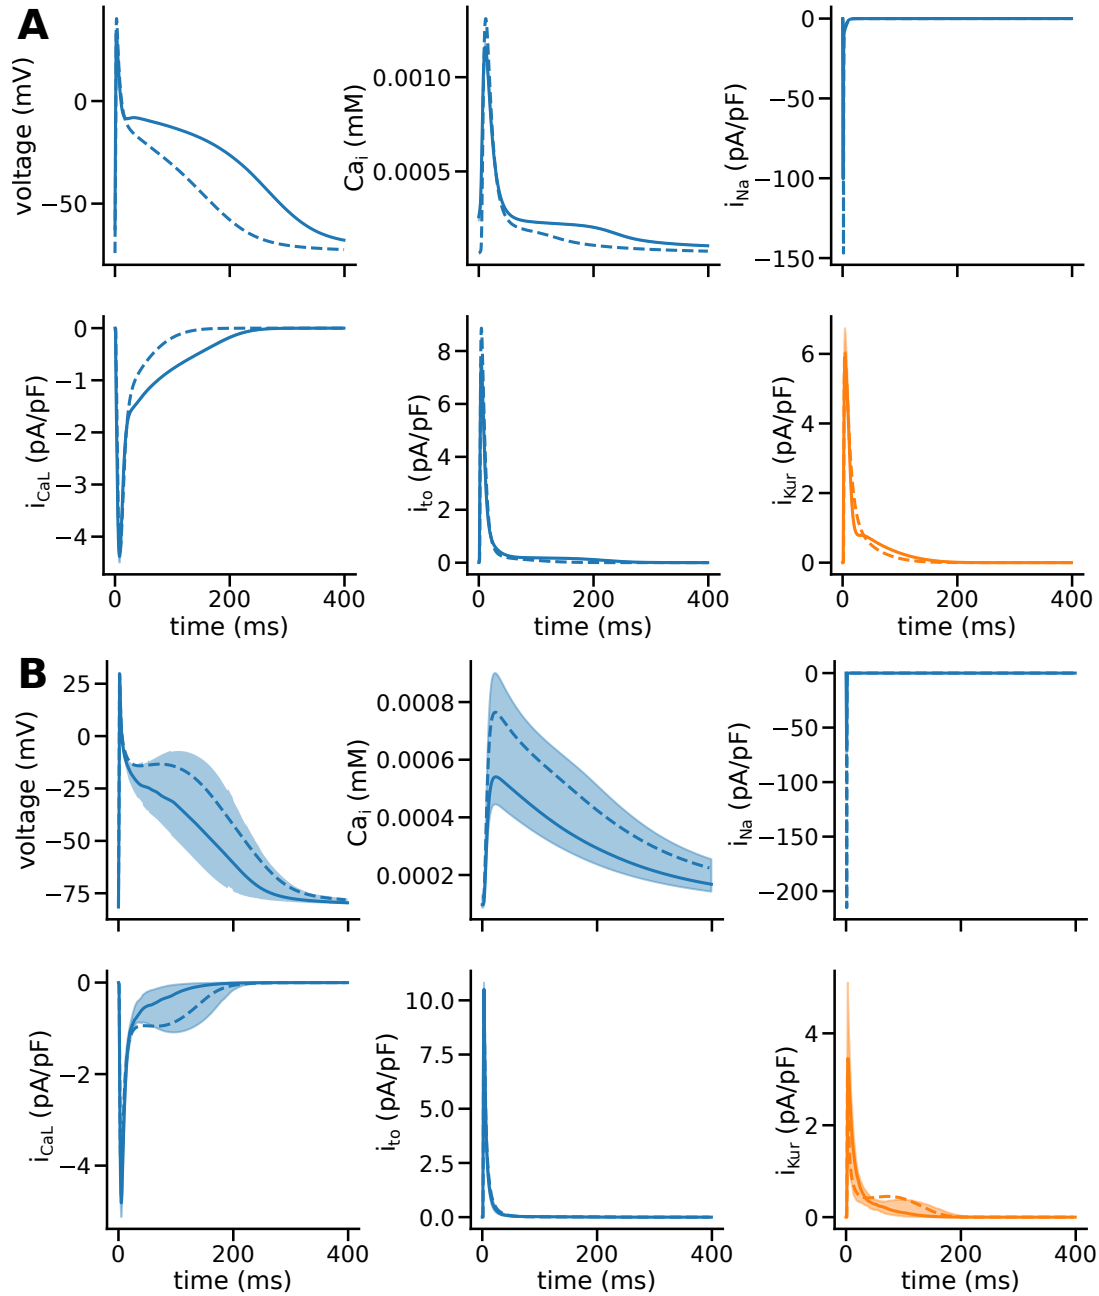

**Supplementary Figure 17:** Action potential, major currents and intracellular calcium concentrations for A: N model and B: C model. Traces using published parameters are represented with dashed lines. Samples from the full cell model with  $I_{Kur}$  replaced by the unified recalibrated parameterisation are displayed as a median line with 89% high density posterior intervals. The orange plot highlights the channel that is recalibrated using the parameter posterior distribution from ABC. All other model parameters are unchanged from published values.

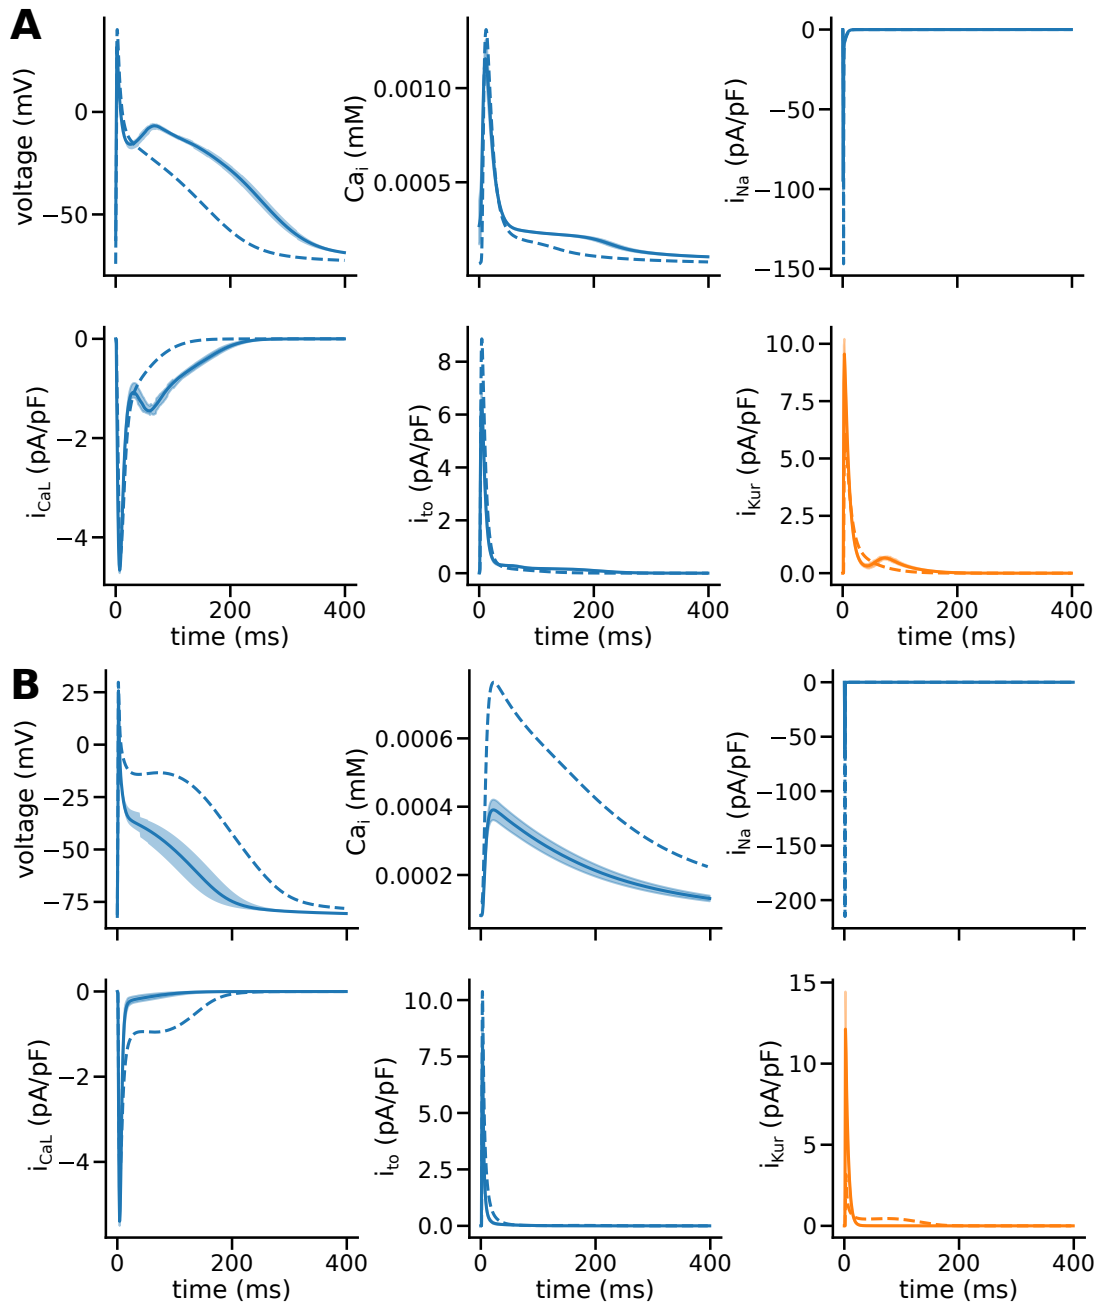

**Supplementary Figure 18:** Action potential, major currents and intracellular calcium concentrations for A: N model and B: C model, with the S form of  $I_{Kur}$  replacing the original form. Traces using published parameters are represented with dashed lines. Samples from the full cell model with  $I_{Kur}$  replaced by the unified recalibrated parameterisation are displayed as a median line with 89% high density posterior intervals. The orange plot highlights the channel that is replaced with the standardised model and using the parameter posterior distribution from ABC. All other model parameters are unchanged from published values.



## S4 Model equations and numerical results

### S4.1 $I_{\text{Na}}$

$$\begin{aligned}
 I_{\text{Na}} &= P_{\text{Na}} m^3 (\mathbf{s}_1 h_1 + (1 - \mathbf{s}_1) h_2) [\text{Na}^+]_c V \frac{\mathbf{F}^2}{\text{RT}} \frac{e^{(V - E_{\text{Na}})F/\text{RT}} - 1.0}{e^{VF/\text{RT}} - 1.0} \\
 \frac{dm}{dt} &= \frac{\bar{m} - m}{\tau_m}, \quad \frac{dh_1}{dt} = \frac{\bar{h} - h_1}{\tau_{h_1}}, \quad \frac{dh_2}{dt} = \frac{\bar{h} - h_2}{\tau_{h_2}} \\
 \bar{m} &= \frac{1.0}{1.0 + e^{-(V + \mathbf{r}_1)/\mathbf{r}_2}}, \quad \tau_m = 1000(\mathbf{r}_3 e^{-((V + \mathbf{r}_4)/\mathbf{r}_5)^2} + \mathbf{r}_6) \\
 \bar{h} &= \frac{1.0}{1.0 + e^{(V + \mathbf{q}_1)/\mathbf{q}_2}} \\
 \tau_{h_1} &= 1000 \left( \frac{\mathbf{q}_3}{1.0 + e^{(V + \mathbf{q}_4)/\mathbf{q}_5}} + \mathbf{q}_6 \right), \quad \tau_{h_2} = 1000 \left( \frac{\mathbf{q}_7}{1.0 + e^{(V + \mathbf{q}_4)/\mathbf{q}_5}} + \mathbf{q}_8 \right)
 \end{aligned}$$

**Supplementary Table 3:** Gating kinetics in Nygren model of  $I_{\text{Na}}$  channel current(see Table 6 in [1]). Time constants are multiplied by 1000 to convert from  $s$  to  $ms$ .

| Name | Original  |                       |           |                        |                       | Unified   |                        |                       |  |  |
|------|-----------|-----------------------|-----------|------------------------|-----------------------|-----------|------------------------|-----------------------|--|--|
|      | Published | Prior                 | Median    | 89% HDPI               | log <sub>10</sub> RSD | Median    | 89% HDPI               | log <sub>10</sub> RSD |  |  |
| r1   | 27.12     | $\mathcal{U}(0, 100)$ | 52.25     | (50.93, 53.52)         | -1.795                | 42.83     | (33.91, 55.13)         | -0.7966               |  |  |
| r2   | 8.21      | $\mathcal{U}(0, 20)$  | 10.69     | (9.769, 11.64)         | -1.256                | 13.19     | (7.761, 19.94)         | -0.5127               |  |  |
| r3*  | 4.2e-05   | $\mathcal{U}(-6, -3)$ | 2.097e-05 | (1.009e-06, 0.000325)  | -0.749                | 1.371e-05 | (1.002e-06, 0.0002247) | -0.7856               |  |  |
| r4   | 25.57     | $\mathcal{U}(0, 100)$ | 57.99     | (22.82, 99.97)         | -0.3404               | 56.79     | (16.97, 99.79)         | -0.293                |  |  |
| r5   | 28.8      | $\mathcal{U}(0, 20)$  | 9.979     | (0.2856, 17.75)        | -0.2282               | 8.932     | (0.03437, 17.49)       | -0.1981               |  |  |
| r6*  | 2.4e-05   | $\mathcal{U}(-6, -3)$ | 2.191e-05 | (1.001e-06, 0.0005717) | -0.7021               | 9.662e-05 | (5.195e-05, 0.0001536) | -1.43                 |  |  |
| q1   | 63.6      | $\mathcal{U}(0, 200)$ | 95.57     | (95.11, 96.11)         | -2.465                | 93.94     | (88.3, 99.55)          | -1.4                  |  |  |
| q2   | 5.3       | $\mathcal{U}(0, 20)$  | 6.5       | (6.085, 6.841)         | -1.432                | 8.182     | (1.222, 13.13)         | -0.3487               |  |  |
| q3*  | 0.03      | $\mathcal{U}(-3, 0)$  | 0.09214   | (0.001002, 0.4502)     | -0.1696               | 0.004096  | (0.002543, 0.02547)    | -0.7312               |  |  |
| q4   | 35.1      | $\mathcal{U}(0, 100)$ | 34.98     | (0.1474, 147.7)        | -0.02249              | 53.57     | (48.79, 57.53)         | -1.263                |  |  |
| q5   | 3.2       | $\mathcal{U}(0, 20)$  | 12.76     | (4.548, 19.99)         | -0.361                | 10.61     | (7.184, 13.18)         | -0.7463               |  |  |
| q6*  | 0.0003    | $\mathcal{U}(-5, -2)$ | 0.0002548 | (1.002e-05, 0.004472)  | -0.6137               | 0.0002403 | (1.006e-05, 0.001556)  | -0.7811               |  |  |
| q7*  | 0.12      | $\mathcal{U}(-3, 0)$  | 0.07443   | (0.001005, 0.3999)     | -0.1983               | 0.02022   | (0.002551, 0.02706)    | -0.6835               |  |  |
| q8*  | 0.003     | $\mathcal{U}(-4, -1)$ | 0.002224  | (0.0001001, 0.04665)   | -0.4589               | 0.0005268 | (0.0001001, 0.00171)   | -0.9219               |  |  |
| s1   | 0.9       | $\mathcal{U}(0, 1)$   | 0.5015    | (0.08985, 0.9754)      | -0.2317               | 0.4717    | (0.1367, 0.8259)       | -0.334                |  |  |

**Supplementary Table 4:** Summary of results for parameters of Nygren  $I_{Na}$  model using original and unified dataset. \*Parameters were searched in  $\log_{10}$  space based on the scale of their published values and are presented in linear space. The prior for these parameters is still in the original  $\log_{10}$  space.

$$\begin{aligned}
I_{\text{Na}} &= g_{\text{Na}} m^3 h j (V - E_{\text{Na}}) \\
\frac{d\phi}{dt} &= \frac{\phi_\infty - \phi}{\tau_\phi}, \quad \text{for } \phi = m, h, j \\
\tau_\phi &= (\alpha_\phi + \beta_\phi)^{-1}, \quad \phi_\infty = \alpha_\phi \tau_\phi, \quad \text{for } \phi = m, h, j \\
\alpha_m &= \begin{cases} \mathbf{a}_{m,2} \frac{V - \mathbf{a}_{m,1}}{1 - e^{-\mathbf{a}_{m,3}(V - \mathbf{a}_{m,1})}} & , \quad \beta_m = \mathbf{b}_{m,1} e^{-V/\mathbf{b}_{m,2}} \\ \mathbf{a}_{m,4}, & \text{if } V = \mathbf{a}_{m,1} \end{cases} \\
\alpha_h &= \begin{cases} \mathbf{a}_{h,1} e^{(V + \mathbf{a}_{h,3}) / -\mathbf{a}_{h,2}} & , \quad a_{h,5} = \mathbf{a}_{h,1} e^{(\mathbf{c}_{h,1} + \mathbf{a}_{h,3}) / -\mathbf{a}_{h,2}} \\ a_{h,5}, & \text{if } V \geq \mathbf{c}_{h,1} \end{cases} \\
\beta_h &= \begin{cases} \mathbf{b}_{h,4} e^{\mathbf{b}_{h,5} V} + \mathbf{b}_{h,6} e^{\mathbf{b}_{h,7} V} \\ (b_{h,1} [1.0 + e^{(V + \mathbf{b}_{h,2}) / -\mathbf{b}_{h,3}}])^{-1}, & \text{if } V \geq \mathbf{c}_{h,1} \end{cases} \\
b_{h,1} &= (\mathbf{b}_{h,4} e^{\mathbf{b}_{h,5} \mathbf{c}_{h,1}} + \mathbf{b}_{h,6} e^{\mathbf{b}_{h,7} \mathbf{c}_{h,1}})^{-1} \left( 1.0 + e^{(\mathbf{c}_{h,1} + \mathbf{b}_{h,2}) / -\mathbf{b}_{h,3}} \right)^{-1} \\
\alpha_j &= \begin{cases} [-\mathbf{a}_{j,1} e^{\mathbf{a}_{j,2} V} - \mathbf{a}_{j,3} e^{-\mathbf{a}_{j,4} V}] \frac{V + a_{j,5}}{1.0 + e^{\mathbf{a}_{j,6}(V + \mathbf{a}_{j,7})}} & , \quad a_{j,5} = -\mathbf{c}_{j,1} \\ 0, & \text{if } V \geq \mathbf{c}_{j,1} \end{cases} \\
\beta_j &= \begin{cases} \mathbf{b}_{j,5} \frac{e^{-\mathbf{b}_{j,6} V}}{1 + e^{-\mathbf{b}_{j,7}(V + \mathbf{b}_{j,8})}} \\ b_{j,1} \frac{e^{-b_{j,2} V}}{1 + e^{-\mathbf{b}_{j,3}(V + \mathbf{b}_{j,4})}}, & \text{if } V \geq \mathbf{c}_{j,1} \end{cases} , \\
b_{j,1} &= \mathbf{b}_{j,5} \frac{e^{-\mathbf{b}_{j,6} \mathbf{c}_{j,1}}}{1 + e^{-\mathbf{b}_{j,7}(\mathbf{c}_{j,1} + \mathbf{b}_{j,8})}} \left[ \frac{e^{-b_{j,2} \mathbf{c}_{j,1}}}{(1 + e^{-\mathbf{b}_{j,3}(\mathbf{c}_{j,1} + \mathbf{b}_{j,4})})} \right]^{-1}, \quad b_{j,2} = 0.0
\end{aligned}$$

**Supplementary Table 5:** Gating kinetics in Courtemanche model of  $I_{\text{Na}}$  channel current (see Appendix in [2]). Values of  $a_{h,5}$ ,  $b_{h,1}$ ,  $a_{j,5}$  and  $b_{j,1}$  are set to enforce continuity in piecewise functions.  $b_{j,2}$  is set to zero to reduce dimensionality of the calibration problem as the published parameter was effectively zero ( $2.535 \times 10^{-7}$ ).

| Original/Unified |           |                        |           |                       |                 |
|------------------|-----------|------------------------|-----------|-----------------------|-----------------|
| Name             | Published | Prior                  | Median    | 89% HDPI              | $\log_{10}$ RSD |
| $a1_m$           | -47.13    | $\mathcal{U}(-100, 0)$ | -75.97    | (-79.77, -73.65)      | -1.586          |
| $a2_m$           | 0.32      | $\mathcal{U}(0, 1)$    | 0.2639    | (0.2476, 0.2741)      | -1.476          |
| $a3_m$           | 0.1       | $\mathcal{U}(0, 1)$    | 0.3355    | (0.1947, 0.7643)      | -0.2765         |
| $a4_m$           | 3.2       | $\mathcal{U}(0, 10)$   | 4.895     | (1.699, 9.998)        | -0.2421         |
| $b1_m$           | 0.08      | $\mathcal{U}(0, 10)$   | 1.263     | (1.225, 1.322)        | -1.64           |
| $b2_m$           | 11.0      | $\mathcal{U}(0, 100)$  | 23.21     | (22.48, 23.74)        | -1.774          |
| $a1_h^*$         | 0.135     | $\mathcal{U}(-2, 1)$   | 0.3845    | (0.01157, 3.35)       | 0.269           |
| $a2_h$           | 6.8       | $\mathcal{U}(0, 50)$   | 15.48     | (14.49, 15.99)        | -1.465          |
| $a3_h$           | 80.0      | $\mathcal{U}(0, 200)$  | 122.2     | (67.51, 155.4)        | -0.6085         |
| $b2_h$           | 10.66     | $\mathcal{U}(0, 100)$  | 18.35     | (5.525, 31.86)        | -0.3218         |
| $b3_h$           | 11.1      | $\mathcal{U}(0, 50)$   | 16.73     | (12.42, 21.47)        | -0.7582         |
| $b4_h^*$         | 3.56      | $\mathcal{U}(-1, 2)$   | 15.11     | (14.51, 15.79)        | -1.999          |
| $b5_h^*$         | 0.079     | $\mathcal{U}(-3, 0)$   | 0.05808   | (0.05716, 0.05887)    | -2.492          |
| $b6_h^*$         | 310000.0  | $\mathcal{U}(3, 6)$    | 21500.0   | (1002.0, 321300.0)    | -0.6777         |
| $b7_h^*$         | 0.35      | $\mathcal{U}(-2, 1)$   | 1.327     | (0.2776, 6.324)       | 0.4741          |
| $c1_h$           | -40.0     | $\mathcal{U}(-100, 0)$ | -37.27    | (-45.94, -32.91)      | -0.8902         |
| $a1_j^*$         | 127100.0  | $\mathcal{U}(3, 7)$    | 123700.0  | (1180.0, 4778000.0)   | -0.6361         |
| $a2_j^*$         | 0.2444    | $\mathcal{U}(-2, 2)$   | 5.144     | (0.1528, 50.75)       | 0.02476         |
| $a3_j^*$         | 3.474e-05 | $\mathcal{U}(-5, -1)$  | 0.0003798 | (1.015e-05, 0.001191) | -0.7783         |
| $a4_j^*$         | 0.04391   | $\mathcal{U}(-4, 0)$   | 0.003784  | (0.0001, 0.02896)     | -0.5131         |
| $a6_j$           | 0.311     | $\mathcal{U}(0, 1)$    | 0.4461    | (0.01244, 0.8846)     | -0.2087         |
| $a7_j$           | 79.23     | $\mathcal{U}(0, 100)$  | 41.53     | (4.671, 91.36)        | -0.1966         |
| $b3_j$           | 0.1       | $\mathcal{U}(0, 1)$    | 0.4481    | (0.001746, 0.8611)    | -0.1977         |
| $b4_j$           | 32.0      | $\mathcal{U}(0, 100)$  | 67.64     | (21.51, 99.97)        | -0.3641         |
| $b5_j$           | 0.1212    | $\mathcal{U}(0, 1)$    | 0.3552    | (0.04405, 0.7968)     | -0.1691         |
| $b6_j^*$         | 0.01052   | $\mathcal{U}(-4, 0)$   | 0.001531  | (0.0001004, 0.01829)  | -0.5618         |
| $b7_j$           | 0.1378    | $\mathcal{U}(0, 1)$    | 0.2679    | (0.0008117, 0.7773)   | -0.09422        |
| $b8_j$           | 40.14     | $\mathcal{U}(0, 100)$  | 72.38     | (31.39, 99.94)        | -0.4359         |
| $c1_j$           | -40.0     | $\mathcal{U}(-100, 0)$ | -33.07    | (-74.3, -0.5147)      | -0.179          |

**Supplementary Table 6:** Summary of results for parameters of Courtemanche  $I_{Na}$  model using original/unified (equivalent) dataset. \*Parameters were searched in  $\log_{10}$  space based on the scale of their published values and are presented in linear space. The prior for these parameters is still in the original  $\log_{10}$  space.

| Unified |                          |          |                      |                 |
|---------|--------------------------|----------|----------------------|-----------------|
| Name    | Prior                    | Median   | 89% HDPI             | $\log_{10}$ RSD |
| $p_1^*$ | $\mathcal{U}(1, 5)$      | 5134.0   | (1620.0, 9786.0)     | -1.241          |
| $p_2$   | $\mathcal{U}(1e-7, 0.2)$ | 0.126    | (0.1048, 0.1524)     | -0.9488         |
| $p_3^*$ | $\mathcal{U}(-3, 1)$     | 3.374    | (0.5586, 6.144)      | -0.2008         |
| $p_4$   | $\mathcal{U}(1e-7, 0.4)$ | 0.0234   | (0.002225, 0.04426)  | -0.2237         |
| $p_5^*$ | $\mathcal{U}(-1, 3)$     | 6.091    | (5.572, 6.662)       | -1.495          |
| $p_6$   | $\mathcal{U}(1e-7, 0.2)$ | 0.0441   | (0.04209, 0.04601)   | -1.523          |
| $p_7^*$ | $\mathcal{U}(-4, 0)$     | 0.005353 | (0.004147, 0.006667) | -1.496          |
| $p_8$   | $\mathcal{U}(1e-7, 0.2)$ | 0.04053  | (0.03871, 0.04302)   | -1.44           |
| $A^*$   | $\mathcal{U}(0, 1)$      | 4.195    | (4.049, 4.314)       | -1.869          |

**Supplementary Table 7:** Summary of results for parameters of standardised  $I_{Na}$  model using unified dataset. \*Parameters were searched in  $\log_{10}$  space and are presented in linear space. The prior for these parameters is still in the original  $\log_{10}$  space.

## S4.2 $I_{\text{CaL}}$

$$\begin{aligned}
 I_{\text{CaL}} &= \bar{g}_{\text{Ca,L}} d_L [f_{\text{Ca}} f_{L_1} + (1 - f_{\text{Ca}}) f_{L_2}] (V - E_{\text{Ca,app}}) \\
 \frac{dd_L}{dt} &= \frac{\bar{d}_L - d_L}{\tau_{d_L}}, \quad \frac{df_{L_1}}{dt} = \frac{\bar{f}_L - f_{L_1}}{\tau_{f_{L_1}}}, \quad \frac{df_{L_2}}{dt} = \frac{\bar{f}_L - f_{L_2}}{\tau_{f_{L_2}}} \\
 \bar{d}_L &= \frac{1.0}{1.0 + e^{(V+\mathbf{p}_1)/-\mathbf{p}_2}}, \quad \tau_{d_L} = 1000 \left( \mathbf{p}_3 e^{-((V+\mathbf{p}_4)/\mathbf{p}_5)^2} + \mathbf{p}_6 \right) \\
 \bar{f}_L &= \frac{1.0}{1.0 + e^{(V+\mathbf{q}_1)/\mathbf{q}_2}} \\
 \tau_{f_{L_1}} &= 1000 \left( \mathbf{q}_3 e^{-((V+\mathbf{q}_4)/\mathbf{q}_5)^2} + \mathbf{q}_6 \right), \quad \tau_{f_{L_2}} = 1000 \left( \mathbf{r}_1 e^{-((V+\mathbf{r}_2)/\mathbf{r}_3)^2} + \mathbf{r}_4 \right)
 \end{aligned}$$

**Supplementary Table 8:** Gating kinetics in Nygren model of  $I_{\text{CaL}}$  channel current (see Table 7 in [1]). Time constants are multiplied by 1000 to convert from  $s$  to  $ms$ .

| Name | Original  |                          |          |                      | Unified               |           |                        |                       |
|------|-----------|--------------------------|----------|----------------------|-----------------------|-----------|------------------------|-----------------------|
|      | Published | Prior                    | Median   | 89% HDPI             | log <sub>10</sub> RSD | Median    | 89% HDPI               | log <sub>10</sub> RSD |
| p1   | 9.0       | $\mathcal{U}(-100, 100)$ | 2.684    | (2.529, 2.906)       | -1.29                 | 9.317     | (5.103, 10.51)         | -0.5683               |
| p2   | 5.8       | $\mathcal{U}(0, 50)$     | 5.055    | (5.022, 5.083)       | -2.416                | 7.378     | (6.679, 8.916)         | -0.9407               |
| p3*  | 0.0027    | $\mathcal{U}(-7, 3)$     | 0.1048   | (0.096, 0.1063)      | -1.869                | 0.001129  | (1e-07, 0.02533)       | -0.2353               |
| p4   | 35.0      | $\mathcal{U}(-100, 100)$ | -11.51   | (-11.6, -11.36)      | -2.151                | -39.18    | (-99.98, 74.02)        | 0.4508                |
| p5   | 30.0      | $\mathcal{U}(0, 50)$     | 18.58    | (18.39, 18.86)       | -2.078                | 28.21     | (6.568, 49.05)         | -0.2817               |
| p6*  | 0.002     | $\mathcal{U}(-7, 3)$     | 0.00996  | (0.009237, 0.0108)   | -1.919                | 0.0009303 | (1.027e-07, 0.0009643) | -0.5757               |
| q1   | 27.4      | $\mathcal{U}(0, 100)$    | 32.02    | (21.21, 47.51)       | -0.5415               | 32.02     | (21.21, 47.51)         | -0.5415               |
| q2   | 7.1       | $\mathcal{U}(0, 50)$     | 8.06     | (1.553, 18.14)       | -0.2068               | 8.06      | (1.553, 18.14)         | -0.2068               |
| q3*  | 0.161     | $\mathcal{U}(-7, 3)$     | 0.04208  | (1.103e-07, 0.7733)  | -0.002009             | 0.04208   | (1.103e-07, 0.7733)    | -0.002009             |
| q4   | 40.0      | $\mathcal{U}(0, 100)$    | 59.81    | (29.52, 99.4)        | -0.3934               | 59.81     | (29.52, 99.4)          | -0.3934               |
| q5   | 14.4      | $\mathcal{U}(0, 50)$     | 25.73    | (2.594, 43.97)       | -0.2737               | 25.73     | (2.594, 43.97)         | -0.2737               |
| q6*  | 0.01      | $\mathcal{U}(-7, 3)$     | 0.007372 | (0.002444, 0.05932)  | -0.5916               | 0.007372  | (0.002444, 0.05932)    | -0.5916               |
| r1*  | 1.332     | $\mathcal{U}(-7, 3)$     | 0.05255  | (1.14e-07, 2.713)    | 0.05333               | 0.05255   | (1.14e-07, 2.713)      | 0.05333               |
| r2   | 40.0      | $\mathcal{U}(0, 100)$    | 45.95    | (13.92, 96.56)       | -0.2224               | 45.95     | (13.92, 96.56)         | -0.2224               |
| r3   | 14.2      | $\mathcal{U}(0, 100)$    | 46.89    | (0.5929, 88.34)      | -0.1519               | 46.89     | (0.5929, 88.34)        | -0.1519               |
| r4*  | 0.0626    | $\mathcal{U}(-7, 3)$     | 0.01455  | (1.051e-07, 0.05889) | -0.2101               | 0.01455   | (1.051e-07, 0.05889)   | -0.2101               |

**Supplementary Table 9:** Summary of results for parameters of Nygren  $I_{\text{CaL}}$  model. Only activation parameters ( $p$ ) recalibrated to unified dataset. \*Parameters were searched in  $\log_{10}$  space based on the scale of their published values and are presented in linear space. The prior for these parameters is still in the original  $\log_{10}$  space.

$$\begin{aligned}
I_{\text{CaL}} &= g_{\text{Ca,L}} df f_{\text{Ca}}(V - E_{\text{Ca,app}}) \\
\frac{dd}{dt} &= \frac{\bar{d} - d}{\tau_d}, \quad \frac{df}{dt} = \frac{\bar{f} - f}{\tau_f} \\
\bar{d} &= \frac{1.0}{1.0 + e^{(V+\mathbf{p}_4)/-\mathbf{p}_5}}, \quad \tau_d = \frac{1 - e^{(V+\mathbf{p}_1)/-\mathbf{p}_2}}{\mathbf{p}_3(V + \mathbf{p}_1) [1 + e^{(V+\mathbf{p}_1)/-\mathbf{p}_2}]} \\
\bar{f} &= \frac{1.0}{1.0 + e^{(V+\mathbf{q}_6)/\mathbf{q}_7}}, \quad \tau_f = \mathbf{q}_1 \left[ \mathbf{q}_2 e^{-\mathbf{q}_3^2(V+\mathbf{q}_4)^2} + \mathbf{q}_5 \right]^{-1}
\end{aligned}$$

**Supplementary Table 10:** Gating kinetics in Courtemanche model of  $I_{\text{CaL}}$  channel current (see Appendix in [2]).

| Name | Original  |                          |           |                        |                       | Unified |                   |                       |                       |  |
|------|-----------|--------------------------|-----------|------------------------|-----------------------|---------|-------------------|-----------------------|-----------------------|--|
|      | Published | Prior                    | Median    | 89% HDPI               | log <sub>10</sub> RSD | Median  | 89% HDPI          | log <sub>10</sub> RSD | log <sub>10</sub> RSD |  |
| p1   | 10.0      | $\mathcal{U}(-100, 100)$ | -63.91    | (-90.59, -30.08)       | -0.5153               | -38.24  | (-99.15, 54.23)   | 0.2831                | 0.2831                |  |
| p2   | 6.24      | $\mathcal{U}(0, 50)$     | 9.655     | (1.853, 18.57)         | -0.2793               | 19.17   | (0.1832, 43.09)   | -0.1334               | -0.1334               |  |
| p3*  | 0.035     | $\mathcal{U}(-7, 3)$     | 2.072e-07 | (1.559e-07, 0.0001709) | -0.6749               | 0.02479 | (0.01392, 0.0721) | -0.7863               | -0.7863               |  |
| p4   | 10.0      | $\mathcal{U}(-100, 100)$ | 19.07     | (6.624, 20.71)         | -0.5022               | 10.44   | (10.05, 10.71)    | -1.66                 | -1.66                 |  |
| p5   | 8.0       | $\mathcal{U}(0, 50)$     | 6.078     | (5.647, 7.053)         | -1.029                | 7.447   | (7.267, 7.638)    | -1.754                | -1.754                |  |
| q1*  | 9.0       | $\mathcal{U}(0, 3)$      | 57.97     | (1.072, 435.5)         | -0.372                | 5.315   | (1.004, 19.81)    | -0.2447               | -0.2447               |  |
| q2*  | 0.0197    | $\mathcal{U}(-2, 3)$     | 0.2487    | (0.01006, 3.008)       | 0.2592                | 1.825   | (0.1754, 6.422)   | 0.3113                | 0.3113                |  |
| q3*  | 0.0337    | $\mathcal{U}(-4, 0)$     | 0.01259   | (0.0001002, 0.1925)    | -0.3061               | 0.1147  | (0.08051, 0.1534) | -1.006                | -1.006                |  |
| q4   | 10.0      | $\mathcal{U}(-100, 100)$ | -11.13    | (-71.3, 88.69)         | 0.8784                | 1.305   | (-1.347, 4.125)   | 0.07887               | 0.07887               |  |
| q5*  | 0.02      | $\mathcal{U}(-4, 0)$     | 0.02488   | (0.0001023, 0.4122)    | -0.1906               | 0.1955  | (0.03626, 0.6931) | -0.2331               | -0.2331               |  |
| q6   | 28.0      | $\mathcal{U}(-100, 100)$ | 27.82     | (25.28, 30.52)         | -1.177                | 33.32   | (25.89, 40.27)    | -0.8614               | -0.8614               |  |
| q7   | 6.9       | $\mathcal{U}(0, 50)$     | 6.879     | (5.583, 8.993)         | -0.8052               | 10.95   | (7.257, 13.98)    | -0.704                | -0.704                |  |

**Supplementary Table 11:** Summary of results of parameters of Courtemanche  $I_{CaL}$  model. \*Parameters were searched in  $\log_{10}$  space based on the scale of their published values and are presented in linear space. The prior for these parameters is still in the original  $\log_{10}$  space.



| Unified |                          |         |                      |                 |
|---------|--------------------------|---------|----------------------|-----------------|
| Name    | Prior                    | Median  | 89% HDPI             | $\log_{10}$ RSD |
| $p_1^*$ | $\mathcal{U}(-7, 3)$     | 0.5513  | (1.02e-07, 1.073)    | 0.1053          |
| $p_2$   | $\mathcal{U}(1e-7, 0.4)$ | 0.01878 | (1.245e-05, 0.05856) | -0.07143        |
| $p_3^*$ | $\mathcal{U}(-7, 3)$     | 0.375   | (0.0056, 1.575)      | 0.07778         |
| $p_4$   | $\mathcal{U}(1e-7, 0.4)$ | 0.09998 | (0.02278, 0.2473)    | -0.1811         |
| $p_5^*$ | $\mathcal{U}(-7, 3)$     | 0.06489 | (0.04241, 0.2347)    | -0.6597         |
| $p_6$   | $\mathcal{U}(1e-7, 0.4)$ | 0.04437 | (0.03053, 0.06118)   | -0.6387         |
| $p_7^*$ | $\mathcal{U}(-7, 3)$     | 0.02056 | (0.01379, 0.02842)   | -1.205          |
| $p_8$   | $\mathcal{U}(1e-7, 0.4)$ | 0.02449 | (0.01303, 0.03353)   | -0.5575         |
| $A^*$   | $\mathcal{U}(0, 3)$      | 4.497   | (3.235, 13.56)       | -0.5354         |

**Supplementary Table 12:** Summary of results of parameters of standardised  $I_{CaL}$  model using unified dataset. \*Parameters were searched in  $\log_{10}$  space and are presented in linear space. The prior for these parameters is still in the original  $\log_{10}$  space.

### S4.3 $I_{to}$

$$\begin{aligned}
 I_{to} &= \bar{g}_t r s (V - E_K) \\
 \frac{dr}{dt} &= \frac{\bar{r} - r}{\tau_r}, \quad \frac{ds}{dt} = \frac{\bar{s} - s}{\tau_s} \\
 \bar{r} &= \frac{1.0}{1.0 + e^{(V - \mathbf{p}_1) / -\mathbf{p}_2}}, \quad \tau_r = 1000 \left( \mathbf{p}_3 e^{-(V / \mathbf{p}_4)^2} + \mathbf{p}_5 \right) \\
 \bar{s} &= \frac{1.0}{1.0 + e^{(V + \mathbf{q}_1) / \mathbf{q}_2}}, \quad \tau_s = 1000 \left( \mathbf{q}_3 e^{-((V + \mathbf{q}_4) / \mathbf{q}_5)^2} + \mathbf{q}_6 \right)
 \end{aligned}$$

**Supplementary Table 13:** Gating kinetics in Nygren model of  $I_{to}$  channel current (see Table 8 in [1]). Time constants are multiplied by 1000 to convert from  $s$  to  $ms$ .

| Name | Original  |                          |           |                        |                       | Unified  |                      |                       |  |  |
|------|-----------|--------------------------|-----------|------------------------|-----------------------|----------|----------------------|-----------------------|--|--|
|      | Published | Prior                    | Median    | 89% HDPI               | log <sub>10</sub> RSD | Median   | 89% HDPI             | log <sub>10</sub> RSD |  |  |
| p1   | 1.0       | $\mathcal{U}(-100, 100)$ | 3.25      | (0.3302, 6.375)        | -0.234                | -0.577   | (-7.205, 2.269)      | 0.4008                |  |  |
| p2   | 11.0      | $\mathcal{U}(1e-7, 50)$  | 10.32     | (7.678, 12.61)         | -0.8453               | 2.197    | (1.381, 2.753)       | -0.6039               |  |  |
| p3*  | 0.0035    | $\mathcal{U}(-7, 0)$     | 4.613e-06 | (1.013e-07, 0.0001495) | -0.6929               | 0.008113 | (0.007376, 0.008801) | -1.931                |  |  |
| p4   | 30.0      | $\mathcal{U}(1e-7, 50)$  | 22.81     | (0.2115, 43.89)        | -0.2055               | 43.54    | (40.81, 46.05)       | -1.426                |  |  |
| p5*  | 0.0015    | $\mathcal{U}(-7, 0)$     | 0.002083  | (1.005e-07, 0.004469)  | -0.4898               | 0.001244 | (0.00109, 0.00137)   | -1.973                |  |  |
| q1   | 40.5      | $\mathcal{U}(-100, 100)$ | 54.85     | (21.94, 90.84)         | -0.4189               | 28.97    | (27.85, 30.79)       | -1.473                |  |  |
| q2   | 11.5      | $\mathcal{U}(1e-7, 50)$  | 15.86     | (5.989, 22.65)         | -0.4416               | 1.161    | (0.3452, 1.969)      | -0.3639               |  |  |
| q3*  | 0.4812    | $\mathcal{U}(-5, 1)$     | 0.3981    | (0.3359, 0.5484)       | -0.6558               | 0.09093  | (0.08613, 0.09628)   | -1.829                |  |  |
| q4   | 52.45     | $\mathcal{U}(-100, 100)$ | 57.94     | (49.6, 63.12)          | -1.104                | 38.16    | (37.65, 38.63)       | -2.083                |  |  |
| q5   | 14.97     | $\mathcal{U}(1e-7, 50)$  | 12.1      | (9.079, 16.57)         | -0.7154               | 16.87    | (16.17, 17.58)       | -1.577                |  |  |
| q6*  | 0.01414   | $\mathcal{U}(-7, 0)$     | 0.01171   | (0.009782, 0.01371)    | -1.577                | 0.008563 | (0.008114, 0.008981) | -2.178                |  |  |

**Supplementary Table 14:** Summary of results for parameters of Nygren  $I_{\text{co}}$  model. \*Parameters were searched in log<sub>10</sub> space based on the scale of their published values and are presented in linear space. The prior for these parameters is still in the original log<sub>10</sub> space.

$$\begin{aligned}
I_{t_o} &= g_{t_o} o_a^3 o_i (V - E_K) \\
\frac{d\phi}{dt} &= \frac{\phi_\infty - \phi}{\tau_\phi}, \quad \text{for } \phi = o_a, o_i \\
\tau_\phi &= (\alpha_\phi + \beta_\phi)^{-1}, \quad \text{for } \phi = o_a, o_i \\
o_{a(\infty)} &= \frac{1.0}{1.0 + e^{(V+p_1)/-p_2}}, \quad \alpha_{o(a)} = \frac{p_3}{e^{(V+p_4)/-p_5} + e^{(V+p_6)/-p_7}}, \quad \beta_{o(a)} = \frac{p_3}{p_8 + e^{(V+p_9)/p_{10}}} \\
o_{i(\infty)} &= \frac{1.0}{1.0 + e^{(V+q_1)/q_2}}, \quad \alpha_{o(i)} = \frac{1.0}{q_3 + e^{(V+q_4)/q_5}}, \quad \beta_{o(i)} = \frac{1.0}{q_6 + e^{(V+q_7)/-q_8}}
\end{aligned}$$

**Supplementary Table 15:** Gating kinetics in Courtemanche model of  $I_{t_o}$  channel current (see Appendix in [2]).

| Original/Unified |           |                          |         |                   |                 |
|------------------|-----------|--------------------------|---------|-------------------|-----------------|
| Name             | Published | Prior                    | Median  | 89% HDPI          | $\log_{10}$ RSD |
| p1               | 20.47     | $\mathcal{U}(-100, 100)$ | 16.34   | (7.558, 24.01)    | -0.5041         |
| p2               | 17.54     | $\mathcal{U}(1e-7, 50)$  | 19.03   | (14.78, 23.36)    | -0.8263         |
| p3*              | 0.65      | $\mathcal{U}(-3, 2)$     | 0.06738 | (0.002023, 0.259) | -0.3748         |
| p4               | 10.0      | $\mathcal{U}(-100, 100)$ | 28.32   | (-0.545, 81.34)   | -0.1259         |
| p5               | 8.5       | $\mathcal{U}(1e-7, 50)$  | 12.98   | (0.01876, 41.94)  | -0.09246        |
| p6               | -30.0     | $\mathcal{U}(-100, 100)$ | 23.19   | (4.345, 94.19)    | -0.07312        |
| p7               | 59.0      | $\mathcal{U}(1e-7, 100)$ | 10.41   | (0.008675, 37.07) | -0.05074        |
| p8*              | 2.5       | $\mathcal{U}(-3, 2)$     | 0.1598  | (0.001051, 2.304) | 0.04982         |
| p9               | 82.0      | $\mathcal{U}(-100, 100)$ | 62.09   | (-8.713, 99.55)   | -0.08063        |
| p10              | 17.0      | $\mathcal{U}(1e-7, 50)$  | 41.35   | (21.91, 49.99)    | -0.5362         |
| q1               | 43.1      | $\mathcal{U}(-100, 100)$ | 33.51   | (30.65, 35.14)    | -1.353          |
| q2               | 5.3       | $\mathcal{U}(1e-7, 50)$  | 6.981   | (5.946, 8.025)    | -0.8174         |
| q3*              | 18.53     | $\mathcal{U}(-1, 4)$     | 3.668   | (0.1006, 14.48)   | 0.1733          |
| q4               | 113.7     | $\mathcal{U}(0, 200)$    | 125.8   | (114.5, 135.2)    | -1.178          |
| q5               | 10.95     | $\mathcal{U}(1e-7, 50)$  | 15.42   | (13.43, 17.26)    | -0.9771         |
| q6*              | 35.56     | $\mathcal{U}(-1, 4)$     | 37.67   | (36.17, 41.82)    | -1.898          |
| q7               | 1.26      | $\mathcal{U}(-100, 100)$ | 31.78   | (27.76, 36.86)    | -0.7325         |
| q8               | 7.44      | $\mathcal{U}(1e-7, 50)$  | 0.6272  | (0.003919, 1.28)  | 0.1188          |

**Supplementary Table 16:** Summary of results for parameters of Courtemanche  $I_{t_o}$  model. Original and unified datasets are equivalent. \*Parameters were searched in  $\log_{10}$  space based on the scale of their published values and are presented in linear space. The prior for these parameters is still in the original  $\log_{10}$  space.

| Unified |                          |           |                       |                 |
|---------|--------------------------|-----------|-----------------------|-----------------|
| Name    | Prior                    | Median    | 89% HDPI              | $\log_{10}$ RSD |
| $p_1^*$ | $\mathcal{U}(-7, 3)$     | 0.00556   | (0.005179, 0.006032)  | -1.904          |
| $p_2$   | $\mathcal{U}(1e-7, 0.4)$ | 0.07096   | (0.06763, 0.07326)    | -1.586          |
| $p_3^*$ | $\mathcal{U}(-7, 3)$     | 0.1906    | (0.1817, 0.1991)      | -1.774          |
| $p_4$   | $\mathcal{U}(1e-7, 0.4)$ | 0.02528   | (0.02459, 0.0261)     | -1.724          |
| $p_5^*$ | $\mathcal{U}(-7, 3)$     | 0.1066    | (0.1019, 0.1129)      | -1.83           |
| $p_6$   | $\mathcal{U}(1e-7, 0.4)$ | 0.05923   | (0.05696, 0.06139)    | -1.57           |
| $p_7^*$ | $\mathcal{U}(-7, 3)$     | 0.0002949 | (0.0002315, 0.000421) | -1.665          |
| $p_8$   | $\mathcal{U}(1e-7, 0.4)$ | 0.08746   | (0.08027, 0.08944)    | -1.478          |

**Supplementary Table 17:** Summary of results for parameters of standardised  $I_{t_0}$  model using unified dataset. \*Parameters were searched in  $\log_{10}$  space and are presented in linear space. The prior for these parameters is still in the original  $\log_{10}$  space.

#### S4.4 $I_{\text{Kur}}$

$$\begin{aligned}
 I_{\text{sus}} &= \bar{g}_{\text{sus}} r_{\text{sus}} s_{\text{sus}} (V - E_{\text{K}}) \\
 \frac{dr_{\text{sus}}}{dt} &= \frac{\bar{r}_{\text{sus}} - r_{\text{sus}}}{\tau_{r_{\text{sus}}}}, & \frac{ds_{\text{sus}}}{dt} &= \frac{\bar{s}_{\text{sus}} - s_{\text{sus}}}{\tau_{s_{\text{sus}}}} \\
 \bar{r}_{\text{sus}} &= \frac{1.0}{1.0 + e^{(V+\mathbf{p}_1)/-\mathbf{p}_2}}, & \tau_{r_{\text{sus}}} &= 1000 \left( \frac{\mathbf{p}_3}{1.0 + e^{(V+\mathbf{p}_4)/\mathbf{p}_5}} + \mathbf{p}_6 \right) \\
 \bar{s}_{\text{sus}} &= \frac{1.0 - \mathbf{q}_3}{1.0 + e^{(V+\mathbf{q}_1)/\mathbf{q}_2}} + \mathbf{q}_3, & \tau_{s_{\text{sus}}} &= 1000 \left( \frac{\mathbf{q}_4}{1.0 + e^{(V+\mathbf{q}_5)/\mathbf{q}_6}} + \mathbf{q}_7 \right)
 \end{aligned}$$

**Supplementary Table 18:** Gating kinetics in Nygren model of  $I_{\text{sus}}$  ( $I_{\text{Kur}}$ ) channel current (see Table 8 in [1]). Time constants are multiplied by 1000 to convert from  $s$  to  $ms$ .

| Name | Original  |                          |           |                        |                 | Unified   |                        |                 |  |  |
|------|-----------|--------------------------|-----------|------------------------|-----------------|-----------|------------------------|-----------------|--|--|
|      | Published | Prior                    | Median    | 89% HDPI               | $\log_{10}$ RSD | Median    | 89% HDPI               | $\log_{10}$ RSD |  |  |
| p1   | 4.3       | $\mathcal{U}(-100, 100)$ | 1.895     | (1.821, 1.946)         | -1.68           | 2.031     | (1.996, 2.056)         | -2.028          |  |  |
| p2   | 8.0       | $\mathcal{U}(1e-7, 50)$  | 4.54      | (4.487, 4.564)         | -2.226          | 4.305     | (4.295, 4.325)         | -2.61           |  |  |
| p3*  | 0.009     | $\mathcal{U}(-5, 0)$     | 0.004119  | (0.004024, 0.004169)   | -2.667          | 0.002799  | (0.002775, 0.002824)   | -3.017          |  |  |
| p4   | 5.0       | $\mathcal{U}(-100, 100)$ | -13.6     | (-14.2, -13.1)         | -1.582          | -19.02    | (-19.31, -18.77)       | -2.056          |  |  |
| p5   | 12.0      | $\mathcal{U}(1e-7, 50)$  | 7.566     | (7.169, 7.953)         | -1.496          | 5.109     | (4.959, 5.271)         | -1.709          |  |  |
| p6*  | 0.0005    | $\mathcal{U}(-6, -1)$    | 0.0007858 | (0.0007327, 0.0008531) | -2.147          | 0.0008455 | (0.0008235, 0.0008719) | -2.58           |  |  |
| q1   | 20.0      | $\mathcal{U}(-100, 100)$ | 21.14     | (8.065, 51.78)         | -0.1842         | 21.14     | (8.065, 51.78)         | -0.1842         |  |  |
| q2   | 10.0      | $\mathcal{U}(1e-7, 50)$  | 12.96     | (0.8947, 27.71)        | -0.2282         | 12.96     | (0.8947, 27.71)        | -0.2282         |  |  |
| q3   | 0.6       | $\mathcal{U}(0, 1)$      | 0.121     | (0.0001271, 0.268)     | -0.1557         | 0.121     | (0.0001271, 0.268)     | -0.1557         |  |  |
| q4*  | 0.047     | $\mathcal{U}(-4, 1)$     | 0.06416   | (0.01542, 0.133)       | -0.6109         | 0.06416   | (0.01542, 0.133)       | -0.6109         |  |  |
| q5   | 60.0      | $\mathcal{U}(-100, 100)$ | 43.27     | (-52.21, 99.65)        | 0.2045          | 43.27     | (-52.21, 99.65)        | 0.2045          |  |  |
| q6   | 10.0      | $\mathcal{U}(1e-7, 50)$  | 27.02     | (1.936, 45.79)         | -0.238          | 27.02     | (1.936, 45.79)         | -0.238          |  |  |
| q7*  | 0.3       | $\mathcal{U}(-3, 2)$     | 0.286     | (0.2161, 0.3196)       | -0.221          | 0.286     | (0.2161, 0.3196)       | -0.221          |  |  |

**Supplementary Table 19:** Summary of results for parameters of Nygren  $I_{Kur}$  model. Only activation parameters ( $p$ ) were recalibrated to unified dataset. \*Parameters were searched in  $\log_{10}$  space based on the scale of their published values and are presented in linear space. The prior for these parameters is still in the original  $\log_{10}$  space.

$$\begin{aligned}
I_{\text{Kur}} &= g_{\text{Kur}} \left( 1.0 + \frac{\mathbf{r}_1}{1.0 + e^{(V+\mathbf{r}_2)/-\mathbf{r}_3}} \right) u_a^3 u_i (V - E_K) \\
\frac{du_a}{dt} &= \frac{u_{a(\infty)} - u_a}{\tau_{u(a)}}, \quad \frac{du_i}{dt} = \frac{u_{i(\infty)} - u_i}{\tau_{u(i)}} \\
u_{a(\infty)} &= \frac{1.0}{1.0 + e^{(V+\mathbf{p}_1)/-\mathbf{p}_2}}, \quad \alpha_{u(a)} = \frac{\mathbf{p}_3}{e^{(V+\mathbf{p}_4)/-\mathbf{p}_5} + e^{(V+\mathbf{p}_6)/-\mathbf{p}_7}}, \quad \beta_{u(a)} = \frac{\mathbf{p}_3}{\mathbf{p}_8 + e^{(V+\mathbf{p}_9)/\mathbf{p}_{10}}} \\
u_{i(\infty)} &= \frac{1.0}{1.0 + e^{(V+\mathbf{q}_1)/\mathbf{q}_2}}, \quad \alpha_{u(i)} = \frac{1.0}{\mathbf{q}_3 + e^{(V+\mathbf{q}_4)/-\mathbf{q}_5}}, \quad \beta_{u(i)} = e^{(V+\mathbf{q}_6)/\mathbf{q}_7} \\
\tau_\phi &= (\alpha_\phi + \beta_\phi)^{-1}, \quad \text{for } \phi = u_a, u_i
\end{aligned}$$

**Supplementary Table 20:** Gating kinetics in Courtemanche model of  $I_{\text{Kur}}$  channel current (see Appendix in [2]).



| Name | Original  |                          |         |                    | Unified               |         |                    |                       |
|------|-----------|--------------------------|---------|--------------------|-----------------------|---------|--------------------|-----------------------|
|      | Published | Prior                    | Median  | 89% HDPI           | log <sub>10</sub> RSD | Median  | 89% HDPI           | log <sub>10</sub> RSD |
| p1   | 30.3      | $\mathcal{U}(-100, 100)$ | 22.15   | (20.09, 24.22)     | -1.213                | 22.15   | (20.09, 24.22)     | -1.213                |
| p2   | 9.6       | $\mathcal{U}(1e-7, 50)$  | 17.41   | (13.63, 21.67)     | -0.8446               | 17.41   | (13.63, 21.67)     | -0.8446               |
| p3*  | 0.65      | $\mathcal{U}(-3, 2)$     | 0.04404 | (0.00102, 0.1094)  | -0.4886               | 0.04404 | (0.00102, 0.1094)  | -0.4886               |
| p4   | 10.0      | $\mathcal{U}(-100, 100)$ | 32.29   | (-4.553, 88.19)    | -0.1005               | 32.29   | (-4.553, 88.19)    | -0.1005               |
| p5   | 8.5       | $\mathcal{U}(1e-7, 50)$  | 16.13   | (3.228, 37.54)     | -0.2495               | 16.13   | (3.228, 37.54)     | -0.2495               |
| p6   | -30.0     | $\mathcal{U}(-100, 100)$ | 32.82   | (-2.739, 87.54)    | -0.1255               | 32.82   | (-2.739, 87.54)    | -0.1255               |
| p7   | 59.0      | $\mathcal{U}(1e-7, 50)$  | 16.26   | (1.388, 32.48)     | -0.2607               | 16.26   | (1.388, 32.48)     | -0.2607               |
| p8*  | 2.5       | $\mathcal{U}(-3, 2)$     | 0.06393 | (0.001001, 0.5319) | -0.1877               | 0.06393 | (0.001001, 0.5319) | -0.1877               |
| p9   | 82.0      | $\mathcal{U}(-100, 100)$ | 47.77   | (-22.92, 99.54)    | 0.04513               | 47.77   | (-22.92, 99.54)    | 0.04513               |
| p10  | 17.0      | $\mathcal{U}(1e-7, 50)$  | 41.82   | (29.25, 49.78)     | -0.6841               | 41.82   | (29.25, 49.78)     | -0.6841               |
| r1*  | 10.0      | $\mathcal{U}(0, 2)$      | 8.721   | (1.004, 61.18)     | -0.2278               | 8.721   | (1.004, 61.18)     | -0.2278               |
| r2   | -15.0     | $\mathcal{U}(-100, 100)$ | -6.353  | (-84.56, 87.51)    | 1.22                  | -6.353  | (-84.56, 87.51)    | 1.22                  |
| r3   | 13.0      | $\mathcal{U}(1e-7, 50)$  | 25.3    | (0.04052, 44.01)   | -0.231                | 25.3    | (0.04052, 44.01)   | -0.231                |
| q1   | -99.45    | $\mathcal{U}(-200, 200)$ | -69.32  | (-144.5, -0.2399)  | -0.1766               | 54.84   | (54.83, 54.85)     | -3.809                |
| q2   | 27.48     | $\mathcal{U}(1e-7, 50)$  | 34.61   | (15.72, 49.44)     | -0.4477               | 39.95   | (39.94, 39.96)     | -3.968                |
| q3*  | 21.0      | $\mathcal{U}(-1, 4)$     | 1941.0  | (0.1185, 5866.0)   | -0.319                | 674.0   | (674.0, 674.0)     | -5.458                |
| q4   | -185.0    | $\mathcal{U}(-200, 200)$ | -118.8  | (-199.4, -34.61)   | -0.2815               | 74.15   | (72.39, 81.09)     | -1.373                |
| q5   | 28.0      | $\mathcal{U}(1e-7, 50)$  | 26.47   | (0.6525, 43.54)    | -0.2649               | 3.708   | (2.084, 4.118)     | -0.6464               |
| q6   | -158.0    | $\mathcal{U}(-200, 0)$   | -172.1  | (-199.5, -133.3)   | -0.8272               | -151.0  | (-199.9, -95.79)   | -0.6078               |
| q7   | 16.0      | $\mathcal{U}(1e-7, 50)$  | 23.66   | (14.8, 28.97)      | -0.5748               | 1.984   | (0.03531, 4.561)   | -0.1569               |

**Supplementary Table 21:** Summary of results for parameters of Courtemanche  $I_{Kur}$ . Only inactivation parameters ( $q$ ) were recalibrated to unified dataset. \*Parameters were searched in  $\log_{10}$  space based on the scale of their published values and are presented in linear space. The prior for these parameters is still in the original  $\log_{10}$  space.

| Unified |                          |           |                        |                 |
|---------|--------------------------|-----------|------------------------|-----------------|
| Name    | Prior                    | Median    | 89% HDPI               | $\log_{10}$ RSD |
| $p_1^*$ | $\mathcal{U}(-7, 3)$     | 0.0558    | (0.0433, 0.06443)      | -1.367          |
| $p_2$   | $\mathcal{U}(1e-7, 0.4)$ | 0.1464    | (0.1281, 0.1683)       | -1.043          |
| $p_3^*$ | $\mathcal{U}(-7, 3)$     | 0.1188    | (0.1096, 0.1279)       | -1.634          |
| $p_4$   | $\mathcal{U}(1e-7, 0.4)$ | 0.02021   | (0.01904, 0.02213)     | -1.306          |
| $p_5^*$ | $\mathcal{U}(-7, 3)$     | 0.004436  | (0.004311, 0.004566)   | -2.485          |
| $p_6$   | $\mathcal{U}(1e-7, 0.4)$ | 0.001568  | (0.001221, 0.001863)   | -0.8671         |
| $p_7^*$ | $\mathcal{U}(-7, 3)$     | 1.424e-07 | (1.005e-07, 3.607e-07) | -1.417          |
| $p_8$   | $\mathcal{U}(1e-7, 0.4)$ | 0.02784   | (0.02351, 0.03098)     | -1.079          |

**Supplementary Table 22:** Summary of results for parameters of standardised  $I_{Kur}$  model using unified dataset. \*Parameters were searched in  $\log_{10}$  space and are presented in linear space. The prior for these parameters is still in the original  $\log_{10}$  space.

## References

- [1] Nygren A, Fiset C, Firek L, Clark JW, Lindblad DS, Clark RB, Giles WR. 1998 Mathematical model of an adult human atrial cell: the role of K<sup>+</sup> currents in repolarization. *Circulation Research* **82**, 63–81. (doi:10.1161/01.res.82.1.63)
- [2] Courtemanche M, Ramirez RJ, Nattel S. 1998 Ionic mechanisms underlying human atrial action potential properties: insights from a mathematical model. *The American Journal of Physiology* **275**, H301–321. (doi:10.1152/ajpheart.1998.275.1.H301)
- [3] Sakakibara Y, Wasserstrom JA, Furukawa T, Jia H, Arentzen CE, Hartz RS, Singer DH. 1992 Characterization of the sodium current in single human atrial myocytes. *Circulation Research* **71**, 535–546. (doi:10.1161/01.res.71.3.535)
- [4] Schneider M, Proebstle T, Hombach V, Hannekum A, Rüdell R. 1994 Characterization of the sodium currents in isolated human cardiocytes. *Pflugers Archiv: European Journal of Physiology* **428**, 84–90. (doi:10.1007/bf00374755)
- [5] Mewes T, Ravens U. 1994 L-type Calcium Currents of Human Myocytes from Ventricle of Non-failing and Failing Hearts and from Atrium. *Journal of Molecular and Cellular Cardiology* **26**, 1307–1320. (doi:10.1006/jmcc.1994.1149)
- [6] Li GR, Nattel S. 1997 Properties of human atrial I<sub>Ca</sub> at physiological temperatures and relevance to action potential. *The American Journal of Physiology* **272**, H227–235. (doi:10.1152/ajpheart.1997.272.1.H227)
- [7] Sun H, Leblanc N, Nattel S. 1997 Mechanisms of inactivation of L-type calcium channels in human atrial myocytes. *The American Journal of Physiology* **272**, H1625–1635. (doi:10.1152/ajpheart.1997.272.4.H1625)
- [8] Shibata EF, Drury T, Refsum H, Aldrete V, Giles W. 1989 Contributions of a transient outward current to repolarization in human atrium. *American Journal of Physiology-Heart and Circulatory Physiology* **257**, H1773–H1781. (doi:10.1152/ajpheart.1989.257.6.H1773)
- [9] Wang Z, Fermini B, Nattel S. 1993 Sustained depolarization-induced outward current in human atrial myocytes. Evidence for a novel delayed rectifier K<sup>+</sup> current similar to Kv1.5 cloned channel currents. *Circulation Research* **73**, 1061–1076. (doi:10.1161/01.res.73.6.1061)
- [10] Firek L, Giles WR. 1995 Outward currents underlying repolarization in human atrial myocytes. *Cardiovascular Research* **30**, 31–38.
- [11] ten Tusscher KHWJ, Noble D, Noble PJ, Panfilov AV. 2004 A model for human ventricular tissue. *American Journal of Physiology. Heart and Circulatory Physiology* **286**, H1573–1589. (doi:10.1152/ajpheart.00794.2003)
- [12] Toni T, Welch D, Strelkowa N, Ipsen A, Stumpf MPH. 2009 Approximate Bayesian computation scheme for parameter inference and model selection in dynamical systems. *Journal of the Royal Society, Interface* **6**, 187–202. (doi:10.1098/rsif.2008.0172)
- [13] Mirams GR, Pathmanathan P, Gray RA, Challenor P, Clayton RH. 2016 Uncertainty and variability in computational and mathematical models of cardiac physiology. *The Journal of Physiology* **594**, 6833–6847. (doi:10.1113/JP271671)
- [14] Beattie KA, Hill AP, Bardenet R, Cui Y, Vandenberg JI, Gavaghan DJ, de Boer TP, Mirams GR. 2018 Sinusoidal voltage protocols for rapid characterisation of ion channel kinetics. *The Journal of Physiology* **596**, 1813–1828. (doi:10.1113/JP275733)
